# Supplementary material for: The Proficiency and Variability of Mathematical Ability in Populations with Autism Spectrum Disorder: A Meta-analysis
Source: Research Square preprint supplement (doi:10.21203/rs.3.rs-5667808/v1), 2025-01-06
Supplement: Supplementary file 1 [file 6b8cac81b8c096f483f19945.docx]

**Supplemental Materials**

**The Proficiency and Variability of Mathematical Ability in Populations with Autism Spectrum Disorder: A Meta-analysis**

**Table of Contents**

I. Supplemental Results

II. Supplemental Table S1

***Supplemental Results***

## The math-IQ relationship between the ASD and the TD control groups

We examined math-IQ correlations in the ASD and the TD control groups, respectively, and then compared the correlation strength between groups. Twenty ASD samples with 871 participants reported 16, 7, and 5 correlations between math scores and full-scale, verbal, and non-verbal IQ, respectively. The meta-analytic correlation estimates between math scores and full-scale/verbal/non-verbal IQs were .624/.625/.512 (*SE* = .049/.087/.161, 95%CI = [.514, .734]/[.393, .857]/[-.237, 1.261], *p* = .000/.001/.095, k = 16/7/5), respectively. Thirteen TD samples with 711 participants reported 10, 4, and 3 correlations between math scores and full-scale, verbal, and non-verbal IQs, respectively. In the TD control groups, the meta-analytic correlation estimates between math scores and full-scale/verbal/non-verbal IQs were .562/.429/.483 (*SE* = .083/.197/.085, 95%CI = [.355, .769]/[-.461, 1.319]/[-.005, .971], *p* = .000/.167/.051, k = 10/4/3), respectively. The ASD groups had comparable math-IQ correlation strength with the TD control groups in all three types of IQs (Hedges’ g = -.050/.776/1.159; *SE* = .475/.708/1.523, 95%CI = [-.982, .881]/ [-.612, 2.164]/ [-1.826, 4.144], *p* = .916/.237/.447, k = 10/4/3 for full-scale, verbal, and non-verbal IQs, respectively). However, due to very few samples available (<5), the math-verbal IQ and math-non-verbal IQ correlations should be interpreted with caution.

Then, we examined the degree of the deviation between mathematics proficiency and IQs (i.e., math-IQ deviation) in the ASD and the TD control groups, and then compared the degrees of deviation between groups. Given that few data of verbal or non-verbal IQs available for computing the deviation, we calculated the math-IQ deviation by subtracting full-scale IQ scores from math scores (Chen et al., 2018; Estes et al., 2011; Jones et al., 2009; McDougal et al., 2020), and used the following formula to calculate the standard deviation of the math-IQ deviation: SD = , where , , and are the standard deviations of full-scale IQs, the standard deviations of math scores, and correlation coefficients between full-scale IQ scores and math scores, respectively.

The mean math-IQ deviation of the 10 ASD samples was -6.04 (*SD* = 4.25; Median = -6.29; Range = -12.05 to 0.00), and the mean of the TD control groups was-1.86 (*SD* = 5.90; Median = -0.74; Range = -13.94 to 6.08). There was no significant difference in the math-IQ deviation between groups (Hedges’ g = .109, *SE* = .331, 95%CI = [-1.398, 1.616], *p* = .775, k = 10). There was no significant effect for any moderators (age: *B* = -.396, *SE* = .210, 95%CI = [-3.065, 2.274], *p* = .311, k = 10; publication year: *B* = .155, *SE* = .067, 95%CI = [-.691, 1.001], *p* = .258, k = 10; symptom severity: *B* = 1.010, *SE* = .492, 95%CI = [-5.219, 7.239], *p* = .288, k = 4; full-scale IQ: *B* = .035, *SE* = .044, 95%CI = [-.520, .590], *p* = .568, k = 10; verbal IQ: *B* = .034, *SE* = .062, 95%CI = [-.752, .820], *p* = .679, k =9; non-verbal IQ: *B* = .058, *SE* = .039, 95%CI = [-.441, .557], *p* = .379, k = 9).

| **Table S1** Empirical studies on the mathematical ability of the individuals with ASD | | | | | | | | | | | | |
| --- | --- | --- | --- | --- | --- | --- | --- | --- | --- | --- | --- | --- |
| Authors | n (male/female) | Age (years) | Mathematics test/tasks | Mathematic score | IQ test | FSIQ | VIQ | NVIQ | Mathematics-IQ relation | ADOS | Calibrated ADOS | Comorbid conditions | |
| Rumsey & Hamburger, 1988 | ASD: 10 (10/0) TD: 10 (10/0) | ASD: M = 26.40 SD = 7.32 TD: M = 28.4 SD = 4.86 | WRAT | ASD: M = 102.4 SD = 13.63 TD: M = 106.00 SD = 9.40 | WAIS | ASD: M = 103.70 SD = 11.00 TD: M = 111.95 SD = 7.19 | ASD: M = 103.40 SD = 9.47 TD: M = 112.80 SD = 3.97 | ASD: M = 103.90 SD = 13.63 TD: M = 111.10 SD = 10.4 | r = 0.80 (FSIQ) r = 0.75 (VIQ) r = 0.74 (NVIQ) | / | / | One participant was blind in the right eye. | |
| Rumsey & Hamburger, 1990 | ASD: 10 (10/0) TD: 25 (25/0) | ASD: M = 26.40 SD = 7.32 TD: M = 24.20 SD = 5.30 | WRAT | ASD: M = 102.40 SD = 14.77 TD: M = 102.36 SD = 9.37 | WAIS | ASD: M = 95.70 SD = 10.99 TD: M = 107.20 SD = 7.57 | ASD: M = 96.40 SD = 9.47 TD: M = 108.40 SD = 7.89 | ASD: M = 95.90 SD = 13.63 TD: M = 104.60 SD = 10.54 | / | / | / | One participant with occluded central retinal artery | |
| Minshew et al., 1992 | ASD:  15(15/0) TD: 15 (15/0) | ASD: M = 21.13 SD = 8.02 TD: M = 21.33 SD = 8.30 | WAIS-R | ASD: M = 91.67 SD = 23.19 TD: M = 101.00 SD = 17.21 | WAIS-R | ASD: M = 95.73 SD = 13.61 TD: M = 96.47 SD = 14.33 | ASD: M = 95.53 SD = 21.63 TD: M = 99.07 SD = 14.21 | ASD: M = 92.87 SD = 10.72 TD: M = 93.27 SD = 10.00 | / | / | / | / | |
| Goldstein et al., 1994 | ASD: 64 < 13 years: 29 (29/0) > 13 years: 35(35/0) TD: 46 < 13 years: 19 (19/0) > 13 years: 27 (27/0) | < 13 years: ASD: M = 5.21 TD: M = 13 > 13 years: ASD: M = 25.14 TD: M = 13 | K-TEA | Math Applications: < 13 years: ASD: M = 101.70 SD = 15.99 TD: M = 103.62 SD = 16.90 > 13 years: ASD: M = 86.20 SD = 22.56 TD: M = 97.00 SD = 17.19  Math Computation: < 13 years ASD: M = 103.67 SD = 21.23 TD: M = 98.81 SD = 18.52 > 13 years: ASD: M = 86.80 SD = 22.56 TD: M = 94.52 SD = 20.86 | WISC-R WAIS-R | < 13 years: ASD: M = 98.93 SD = 12.48 TD: M = 101.58 SD = 10.40 > 13 years: ASD: M = 93.00 SD = 10.40 TD: M = 93.78 SD = 13.65 | < 13 years: ASD: M = 98.90 SD = 14.52 TD: M = 102.37 SD = 9.03 > 13 years: ASD: M = 95.57 SD = 18.04 TD: M = 95.11 SD = 14.47 | < 13 years: ASD: M = 99.21 SD = 11.88 TD: M = 101.16 SD = 11.60 > 13 years: ASD: M = 90.94 SD = 12.95 TD: M = 92.56 SD = 11.71 | / | / | / | / | |
| Minshew et al., 1994 | ASD: 54 (54/0) TD: 41 (41/0) | ASD: M = 16.30 SD = 10.16 TD: M = 15.38 SD = 8.57 | K-TEA | Math test 1 ASD: M = 92.25 SD = 21.87 TD: M = 99.54 SD = 17.41  Math test 2 ASD: M = 94.40 SD = 21.93 | WISC-R WAIS-R | ASD: M = 95.50 SD = 15.54 TD: M = 98.32 SD = 12.70 | ASD: M = 97.69 SD = 17.56 TD: M = 99.51 SD12.95 | ASD: M = 93.50 SD = 13.72 TD: M = 97.00 SD = 12.47 | / | / | / | / | |
| Myles et al., 1994 | ASD: 41 (35/6) TD: \ | R = 3-18 ASD: M = 10.50 SD = \ TD: \ | Woodcock-Johnson Psycho-Educational Battery Achievement Tests | R = 38-115 ASD: M = 80.00 SD = 18.90 TD: \ | WISC-R | ASD: M = 80.42 SD = 22.92 TD: \ | ASD: M = 81.30 SD = 22.24 TD: \ | ASD: M = 85.58 SD = 25.27 TD: \ | / | / | / | / | |
| Goldstein et al., 2001 | ASD: 35 (31/4) TD: \ | ASD: M = 26.62 SD = 9.23 TD:  \ | WAIS-R | ASD: M = 82.88 SD = 22.92 TD: \ | WAIS-R | ASD: M = 91.88 SD = 16.05 TD: \ | ASD: M = 94.91 SD = 19.57 TD: \ | ASD: M = 89.44 SD = 11.92 TD: \ | / | / | / | / | |
| Griswold et al., 2002 | ASD: 21 (19/2) TD: \ | ASD: M = 10.00 SD = \ TD: \ | WIAT | Numerical Operations ASD: M = 89.81 SD = 18.22 TD: \  Mathematics Reasoning ASD: M = 96.90 SD = 21.03 TD: \ | WIAT | ASD: M = 100.14 SD = 26.06 TD: \ | ASD: M = 99.07 SD = 27.47 TD: \ | ASD: M = 101.14 SD = 24.32 TD: \ | / | / | / | / | |
| Mayes & Calhoun, 2003a | ASD: 21 IQ<80: ≥6 years: TD: \  ASD: 36 IQ≥80:  <6 years: TD: \  ASD: 42 IQ≥6 years: TD: \ | R = 3- 15 IQ<80: ≥6 years: ASD: M = 10.50 SD = \ TD: \  IQ≥80: <6 years: ASD: M = 4.50 SD = \ TD: \  IQ ≥6 years: ASD: M = 10.50 SD = \ TD: \ | WIAT | IQ<80: ≥6 years: R = 11- 100 ASD: M = 64.00 SD = 23.00 TD: \  IQ≥80: <6 years: R = 63- 122 ASD: M = 98.00 SD = 14.00 TD: \ IQ≥6 years: R = 61- 135 ASD: M = 96.00 SD = 16.00 TD: \ | SBIS-IV WISC-III | IQ<80: ≥6 years: ASD: M = 63.00 SD = 14.00 TD: \  IQ≥80: <6 years: ASD: M = 100.00 SD = 13.00 TD: \ ≥6 years: ASD: M = 102.00 SD = 16.00 TD: \ | IQ<80: ≥6 years: ASD: M = 93.00 SD = 13.00 TD: \  IQ≥80: <6 years: ASD: M = 93.00 SD = 13.00 TD: \ ≥6 years: ASD: M = 104.00 SD = 17.00 TD: \ | IQ<80: ≥6 years: ASD: M = 68.00 SD = 15.00 TD: \  IQ≥80: <6 years: ASD: M = 104.00 SD = 15.00 TD: \ ≥6 years: ASD: M = 100.00 SD = 16.00 TD: \ | IQ<80: ≥6 years: r = 0.67 (FSIQ) IQ≥80: <6 years: r = 0.63 (FSIQ) ≥6 years: r = 0.52 (FSIQ) | / | / | / | |
| Mayes & Calhoun, 2003b | SBIS-IV Group: ASD:36 TD: \  WISC-III Groups: IQ < 80: ASD:31 TD: \ IQ ≥80: ASD:42 TD: \ | SBIS-IV Group: R = 3-7 ASD: M = 4.80 SD = \ TD: \  WISC-III Groups: R = 6- 15 IQ < 80: ASD: M = 8.50 SD = \ TD: \ IQ ≥80: ASD: M = 8.50 SD = \ TD: \ | WIAT | SBIS-IV Group: R = 63-122 ASD: M = 97.00 SD = 15.00 TD: \  WISC-III Groups: IQ < 80: R = 25- 10 ASD: M = 68.00 SD = 18.00 TD: \ IQ ≥80: R = 61- 135 ASD: M = 96.00 SD = 16.00 TD: \ | SBIS-IV WISC-III | SBIS-IV Group: ASD: M = 99.00 SD = 13.00 TD: \  WISC-III Groups: IQ < 80: ASD: M = 67.00 SD = 10.00 TD: \ IQ ≥80: ASD: M = 103.00 SD = 16.00 TD: \ | SBIS-IV Group: ASD: M = 92.00 SD = 14.00 TD: \  WISC-III Groups: IQ < 80: ASD: M = 70.00 SD = 9.00 TD: \ IQ ≥80: ASD: M = 105.00 SD = 16.00 TD: \ | SBIS-IV Group: ASD: M = 104.00 SD = 14.00 TD: \  WISC-III Groups: IQ < 80: ASD: M = 70.00 SD = 13.00 TD: \ IQ ≥80: ASD: M = 100.00 SD = 16.00 TD: \ | For children with their IQ ≥ 80, their arithmetical skills were lower than their full-scale IQ. | / | / | / | |
| Gagnon et al., 2004 | ASD: 14 (14/0) TD: 14 (14/0) | R = 10-21 ASD:  M = 15.07 SD = 3.40 TD: M = 14.50 SD = 2.80 | Numerical Estimation (numbers: 2-9) | ASD: M = 0.88 SD = 7.90 TD: M = 0.83 SD = 11.00 | WISC-III | ASD: M = 106.80 SD = 9.80 TD: / M;107.80 SD = 9.30 | ASD: M = 103.90 SD = 18.00 TD:  M = 106.6 SD = 9.50 | ASD:  M = 109.00 SD = 9.80 TD:  M = 108.20 SD = 11.40 | / | / | / | / | |
| Mayes & Calhoun, 2006 | ASD: 87 TD: \ | R = 6-16 ASD: M = 9.10 SD = 2.50 TD: \ | Numerical operations of WIAT | ASD: M = 97.00 SD = 17.00 TD: \ | WISC-III | ASD: M = 92.00 SD = 22.00 TD: \ | ASD: \ TD: \ | ASD: \ TD: \ | 23% of the ASD participants with math learning disability. | / | / | / | |
| Williams et al., 2006 | ASD: 38 TD: 38 | R = 8-16 ASD: M = 11.68 SD = 2.46 TD: M = 12.16 SD = 2.19 | WISC-III | ASD: M = 11.13 SD = 4.28 TD: M = 11.86 SD = 2.62 | WISC-III | ASD: M = 103.82 SD = 14.29 TD: / M = 107.18 SD = 9.37 | ASD: M = 106.42 SD = 15.97 TD: / M = 107.34 SD = 8.09 | ASD: M = 100.55 SD = 14.19 TD: / M = 105.95 SD = 10.43 | / | / | / | / | |
| Mayes & Calhoun, 2008 | ASD: 54(48/6) TD: \ | R = 6-14 ASD: M = 8.20 SD = 2.00 TD: \ | WIAT-II | ASD: M = 99.00 SD = 17.00 TD: \ | WISC-IV | ASD: M = 101.00 SD = 19.00 TD: \ | ASD: \ TD: \ | ASD: \ TD: \ | r = 0.80 (FSIQ) | / | / | / | |
| Jones et al., 2009 | ASD: 100(91/9) Group 1 (Numerical Operations > FSIQ): ASD: 16 TD: \ Group 2 (Numerical Operations = FSIQ): ASD: 77 TD: \ Group 3 (Numerical Operations < FSIQ): ASD: 6 TD: \ | R = 14.67-16.75 Group 1: ASD: M = 15.50 SD = 0.50 TD: \ Group 2: ASD: \ TD: \ Group 3: ASD: \ TD: \ | WOND | Numerical Operations: Group 1 (Numerical Operations > FSIQ): ASD: M = 120.40 SD = 10.00 TD: \ Group 2 (Numerical Operations = FSIQ): ASD: M = 79.40 SD = 20.70 TD: \ Group 3 (Numerical Operations < FSIQ): ASD: M = 77.80 SD = 9.20 TD: \  Mathematics Reasoning: Group 1 (Numerical Operations > FSIQ): ASD: M = 111.30 SD = 10.10 TD: \ Group 2 (Numerical Operations = FSIQ): ASD: M = 78.60 SD = 21.20 TD: \ Group 3 (Numerical Operations < FSIQ): ASD: M = 81.50 SD = 10.60 TD: \ | WASI | Group 1 (Numerical Operations > FSIQ): ASD: M = 96.90 SD = 11.50 TD: \ Group 2 (Numerical Operations = FSIQ): ASD: M = 80.70 SD = 18.30 TD: \ Group 3 (Numerical Operations < FSIQ): ASD: M = 96.30 SD = 9.90 TD: \ | Group 1 (Numerical Operations > FSIQ): ASD: M = 90.60 SD = 13.20 TD: \ Group 2 (Numerical Operations = FSIQ): ASD: M = 78.30 SD = 18.70 TD: \ Group 3 (Numerical Operations < FSIQ): ASD: M = 85.70 SD = 18.80 TD: \ | Group 1 (Numerical Operations > FSIQ): ASD: M = 104.60 SD = 12.20 TD: \ Group 2 (Numerical Operations = FSIQ): ASD: M = 86.10 SD = 18.30 TD: \ Group 3 (Numerical Operations < FSIQ): ASD: M = 107.50 SD = 8.40 TD: \ | About 16.2 % autistic adolescents have average intelligence and superior arithmetic ability. | / | / |  | |
| Estes et al., 2011 | ASD: 30 (25/5) TD: \ | R = 9-9 ASD: M = 9.00 SD = \ TD: \ | DAS | ASD: M = 92.70 SD = 18.29 TD: \ | DAS | ASD: M = 97.57 SD = 14.48 TD: \ | ASD: M = 90.73 SD = 18.01 TD: \ | ASD: M = 100.20 SD = 16.78 TD: \ | / | / | / | / | |
| Assouline et al., 2012 | ASD: 59 (50/9) TD: \ | R = 5.5-17.92 ASD: M = 10.58 SD = 3.19 TD: \ | WJ-III-ACH | R = 86-153 ASD: M = 119.26 SD = 13.582 TD: \ | WISC-IV WAIS-III | ASD: M = 120 SD = \ TD: \ | ASD: \ TD: \ | ASD: \ TD: \ | / | / | / | / | |
| Foley-Nicpon et al., 2012 | Group HFA ASD: 18 (13/5) TD: \ Group AS/PDD-NOS ASD: 21 (19/2) TD: \ | Group HFA R = 6-16 ASD: M = 11.09 SD = \ TD: \  Group AS/PDD-NOS R = 6-16 ASD: M = 11.25 SD = \ TD: \ | WJ-III-ACH | Group HFA: ASD: M = 122.55 SD = 13.07 TD: \  Group AS/PDD-NOS: ASD: M = 118.38 SD = 14.09 TD: \ | WISC-IV | Group HFA: ASD: M = 120.29 SD = 9.18 TD: \  Group AS/PDD-NOS: ASD: 124.89 SD = 13.59 TD: \ | Group HFA: ASD: \ TD: \  Group AS/PDD-NOS: ASD: \ TD: \ | Group HFA: ASD: \ TD: \  Group AS/PDD-NOS: ASD: \ TD: \ | / | / | / | / | |
| Gwaltney, 2012 | ASD: 37 (28/9) TD: 38 (26/12) | R = 8- 16 ASD: M = 11.83 SD = 2.86 TD: M = 11.53 SD = 2.28 | WIAT-III | ASD: M = 96.59 SD = 17.79 TD: M = 111.11 SD = 14.16 | WAIS | ASD: M = 106.24 SD = 16.34 TD: M = 113.79 SD = 13.9 | ASD: M = 109.24 SD = 17.38 TD: M = 115.37 SD = 14.67 | ASD: M = 102.89 SD = 14.91 TD: M = 109.74 SD = 13.84 | ASD: r = 0.760 (FSIQ)  r = 0.730 (VIQ)  r = 0.570 (NVIQ)  TD: r = 0.550 (FSIQ)  r = 0.440 (VIQ)  r = 0.570 (NVIQ) | / | / | / | |
| McKnight & Culotta, 2012 | ASD: 23 (0/23) TD: \ | R = 7- 21 ASD: M = 12.42 SD = \ TD: \ | WJ-III-ACH | ASD: M = 98.10 SD = 16.00 TD: \ | WISC-III WISC-IV | ASD: M = 106.00 SD = 11.40 TD: \ | ASD: M = 110.00 SD = 14.10 TD: \ | ASD: M = 107.00 SD = 14.10 TD: \ | / | / | / | / | |
| May et al., 2013 | ASD: 64 (32/32) TD: 60 (30/30) | R = 7- 12 ASD: M = 9.90 SD = 1.84 TD: M = 9.90 SD = 1.71 | WIAT | ASD: M = 87.61 SD = 18.66 TD: M = 97.97 SD = 13.66 | WPPSI-III WISC-IV | ASD: M = 96.78 SD = 13.16 TD: M = 107.47 SD = 11.57 | ASD: M = 98.89 SD = 13.78 TD: M = 107.03 SD = 9.64 | ASD: M = 101.08 SD = 14.98 TD: M = 106.35 SD = 13.51 | r = 0.407 (FSIQ) | / | / | / | |
| Oliver, 2013 | ASD:  22 (18/4) TD: 23 (12/11) | ASD: M = 10.36 SD = 1.80 TD: M = 11.48 SD = 2.02 | KTEA-II | ASD: M = 96.18 SD = 15.41 TD: M = 105.90 SD = 16.77 | KBIT-2 | ASD: M = 99.27 SD = 17.55 TD: M = 109.43 SD = 14.24 | ASD: \ TD: \ | ASD: \ TD: \ | / | / | / | / | |
| Bangel et al., 2014 | ASD: 14 (10/4) TD: 14 (10/4) | R = 21.17-28.73 ASD: M = 24.77 SD = \ TD: M = 24.92 SD = \ | Numerical Estimation | ASD: M = 74.10 SD = 8.30 TD: M = 78.90 SD = 3.90 | WAIS | ASD: M = 108 SD = \ TD: M = 120 SD = \ | ASD: \ TD: \ | ASD: \ TD: \ | / | / | / | / | |
| Troyb et al., 2014 | ASD: 41 (37/4) TD: 34 (31/3) | R = 8.6-20.0 ASD: M = 13.81 SD = 2.67 TD: M = 13.87 SD = 2.58 | WJ-III-ACH | ASD: M = 104.23 SD = 12.79 TD: M = 109.68 SD = 10.54 | WAIS | ASD: \ TD: \ | ASD: M = 104.93 SD = 14.55 TD: M = 112.00 SD = 11.17 | ASD: M = 110.00 SD = 13.02 TD: M = 112.79 SD = 11.32 | r = 0.76 (FSIQ) | ADOS Socialization:  M = 6.85 SD = 2.25  ADOS Communication:  M = 3.59  SD = 1.43 |  | / | |
| Iuculano et al., 2014 | ASD: 18 (14/4) TD: 18 (14/4) | R = 7.00-12.00 ASD: M = 9.60 SD = 1.64 TD: M = 9.59 SD = 1.53 | WIAT-II | Numerical Operations: ASD: M = 119.61 SD = 20.94 TD: M = 103.94 SD = 14.00  Math Reasoning: ASD: M = 111.22 SD = 11.14 TD: M = 104.78 SD = 11.53 | WASI | ASD: M = 113.27 SD = 15.25 TD: M = 113.27 SD = 15.50 | ASD: M = 112.00 SD = 19.32 TD: M = 112.72  SD = 16.64 | ASD: M = 112.05 SD = 17.88 TD: M = 111.22 SD = 16.65 | / | ADOS Social: M = 8.24 SD = 1.86 ADOS Communication: M = 3.41 SD = 1.46 ADOS Algorithm: M = 11.65 SD = 3.10 | / | / | |
| Aagten-Murphy et al., 2015 | ASD: 32 (28/4) TD: 32 (26/6) | R = 8- 13 ASD: M = 10.28 SD = 1.30 TD: M = 9.90 SD = 1.07 | WOND Nonsymbiotic estimation (ANS)  Symbolic estimation (number line task) | WOND Numerical Operations: ASD: M = 94.25 SD = 13.60 TD: M = 105.90 SD = 16.10  WOND Mathematical Reasoning: ASD: M = 100.78 SD = 14.90 TD: M = 105.90 SD = 16.10  WOND Composite Score: ASD: M = 97.09 SD = 15.00 TD: M = 105.90 SD = 16.10 | WAIS | ASD: M = 106.30 SD = 9.60 TD: M = 108.22 SD = 12.80 | ASD: M = 103.09 SD = 10.80 TD: M = 107.56 SD = 12.00 | ASD: M = 108.41 SD = 12.60 TD: M = 107.25 SD = 13.40 | Group 1: ASD: r = 0.200 (FSIQ) TD: r = 0.560 (FSIQ)  Group 2: ASD: r = 0.240 (FSIQ) TD: r = 0.510 (FSIQ)  Group 3: ASD: r = 0.230 (FSIQ) TD: r = 0.550 (FSIQ) | / | / | / | |
| Furlano et al., 2015 | ASD: 19 (18/1) TD: 22(15/7) | R = 12- 18 ASD: M = 15.21 SD = 2.04 TD: M = 14.02 SD = 1.74 | WJ-III-ACH | ASD: M = 9.00 SD = 3.40 TD: M = 12.11 SD = 1.62 | WAIS | ASD: M = 99.47 SD = 18.36 TD: M = 108.86 SD = 7.81 | ASD: M = 97.21 SD = 18.50 TD: M = 104.23 SD = 10.98 | ASD: M = 101.74 SD = 16.58 TD: M = 112.18 SD = 8.02 | / | ADOS composite score:  M = 11.53 SD = 3.58 |  | Four participants  with ADHD, 1 Social Anxiety Disorder, 1 Generalized Anxiety Disorder, 2 Learning Disability, 2 Auditory Processing Dysfunction, and 1 participant with ADHD and Oppositional Defiant Disorder | | |
| May et al., 2015 | ASD: 40 (20/20) TD: 40 (20/20) | R = 7- 12 ASD: M = 9.62 SD = 1.57 TD: M = 9.62 SD = 1.34 | WIAT-II | ASD: M = 18.00 SD = 7.90 TD: M = 20.00 SD = 6.60 | WISC-IV | ASD: \ TD: \ | ASD: M = 100.70 SD = 13.40 TD: M = 107.20 SD = 10.50 | ASD: M = 100.50 SD = 15.10 TD: M = 104.80 SD = 14.40 | / | / | / | / | |
| Seh-Bae et al., 2015 | ASD: 20 (18/2) TD: 20 (13/7) | ASD: M = 10.60 SD = 0.94 TD: M = 10.27 SD = 0.54 | TOMA-2-SP MWPS | TOMA-2-SP: ASD: M = 9.35 SD = 4.06 TD: M = 12.55 SD = 2.76  MWPS: ASD: M = 11.00 SD = 3.20 TD: M = 12.20 SD = 1.96 | KBIT-2 | ASD: M = 109.60 SD = 15.85 TD: M = 109.65 SD = 11.89 | ASD: M = 99.90 SD = 18.39 TD: M = 103.50 SD = 14.97 | ASD: M = 115.90 SD = 14.20 TD: M = 112.80 SD = 10.37 | / | / | / | / | |
| Stroizer et al., 2015 | ASD: 3 (3/0) TD: \ | R = 8- 10 ASD: M = 9.33 SD = 0.58 TD: \ | KBIT-2 | R = 65-73 ASD: M = 68.67 SD = 4.04 TD: \ | KBIT-2 | ASD: M = 64.33 SD = 9.02 TD: \ | ASD: \ TD: \ | ASD: \ TD: \ | / | / | / | / | |
| Titeca et al., 2015b | ASD: 30(25/5) TD: 30 (25/5) | R = 5-6 ASD: M = 5.98 SD = 0.31 TD: M = 5.86 SD = 0.25 | Verbal Subitizing Counting  Magnitude Comparison  Number Line Arithmetic Operations | Verbal Subitizing: ASD: M = 62.42 SD = 14.45 TD: M = 67.39 SD = 17.43  Procedural Counting: ASD: M = 69.58 SD = 27.40 TD: M = 80.83 SD = 20.16  Conceptual Counting: ASD: M = 77.94 SD = 22.65 TD: M = 89.49 SD = 10.20  Magnitude Comparison: ASD: M = 70.93 SD = 13.64 TD: M = 73.47 SD = 9.30  Arithmetic Operations: ASD: M = 83.99 SD = 19.32 TD: M = 83.89 SD = 19.81  Estimation: ASD: M = 77.78 SD = 10.11 TD: M = 81.27 SD = 6.94 | WPPSI-III | ASD: M = 104.83 SD = 12.36 TD: M = 109.03 SD = 11.56 | ASD: \ TD: \ | ASD: \ TD: \ | / | / | / | / | |
| Tzanakaki et al., 2015 | ASD: 6 (6/0) TD: \ | ASD: M = 5.47 SD = 1.10 TD: \ | TEMA-3 EN-CBM | ASD: M = 66.93 SD = 9.32 TD: \ | SBIS-IV Leiter-R | ASD: M = 75.67 SD = 16.48 TD: \ | ASD: \ TD: \ | ASD: \ TD: \ | / | / | / | / | |
| Hiniker et al., 2016 | ASD: 36 (32/4) TD: 61(54/7) | R = 7-12 ASD: M = 9.66 SD = 1.60 TD: M = 9.60 SD = 1.49 | WIAT-II  Non-symbolic Number Sense Task  Symbolic Number Sense Task | WIAT-II  Math Composite: ASD: M = 109.19 SD = 25.39 TD: M = 110.33 SD = 16.98  WIAT-II Numerical Operations: ASD: M = 105.67 SD = 23.57 TD: M = 108.25 SD = 17.56  WIAT-II Mathematical Reasoning: ASD: M = 109.94 SD = 22.36 TD: M = 110.69 SD = 14.52 | WAIS | ASD: M = 109.19 SD = 20.45 TD: M = 110.90 SD = 15.58 | ASD: M = 104.92 SD = 17.84 TD: M = 110.84 SD = 16.93 | ASD: M = 111.64 SD = 23.30 TD: M = 108.54 SD = 15.20 | r = 0.63 (FSIQ) | ADOS Social:  M = 8.07 SD = 2.27  ADOS Communication:  M = 3.52 SD = 1.68 | / | / | |
| Oswald et al., 2016 | ASD: 27(21/6) TD: 27(21/6) | R = 9.08-10.58 ASD: M = 14.88 SD = 1.68 TD: M = 14.73 SD = 1.92 | WIAT-III | ASD: M = 93.67 SD = 16.52 TD: M = 106.78 SD = 13.10 | WASI-II | ASD: M = 100.89 SD = 11.10 TD: M = 104.78 SD = 8.61 | ASD: M = 99.48 SD = 12.25 TD: M = 105.11 SD = 9.28 | ASD: M = 103.19 SD = 12.88 TD: M = 103.59 SD = 10.95 | 22% of the ASD participants with math learning disability 4% with math giftedness. | ADOS-2 Module 3: M = 11.60 SD = \  ADOS-2 Module 4: M = 8.70 SD = \ | \ | / | |
| John et al., 2017 | ASD: 32 (27/5) TD: \ | ASD: M = 9.46 SD = 0.40 TD: \ | DAS Differential Ability Scales | R = 59-125 ASD: M = 91.61 SD = 18.98 TD: \ | DAS Differential Ability Scales | ASD: \ TD: \ | ASD: \ TD: \ | ASD: \ TD: \ | / | / | / | / | |
| Kim et al., 2017 | Age 9: 74 (66/8) IQ < 85: 47  IQ >= 85: 27   Age 18: 74 (66/8)  IQ < 85: 44  IQ >= 85: 30 | R = 9-9 / 18-18 Age 9:  IQ < 85: ASD: M = 9.00  SD = \ TD: \  IQ ≥ 85: ASD: M = 9.00 SD = \ TD: \  Age 18:  IQ < 85: ASD: M = 18.00 SD = \ TD: \  IQ ≥ 85:  ASD: M = 18.00 SD = \ TD: \ | WRAT-3 | Age 9:  IQ < 85: ASD: M = 53.30 SD = 22.10 TD: \ IQ ≥ 85: ASD: M = 101.30 SD = 17.10 TD: \  Age 18:  IQ < 85: ASD: M = 59.30 SD = 25.30 TD: \  IQ ≥ 85:  ASD: M = 115.30 SD = 21.90 TD: \ | WAIS WISC-III | Age 9:  IQ < 85: ASD: M = 55.00 SD = 14.90 TD: \ IQ ≥ 85: ASD: M = 103.30 SD = 11.90 TD: \  Age 18:  IQ < 85: ASD: M = 41.10 SD = 19.10 TD: \ IQ ≥ 85:  ASD: M = 110.10 SD = 13.70 TD: \ | ASD: \ TD: \ | ASD: \ TD: \ | Higher FSIQ at age 3 significantly predicted higher WRAT arithmetic at age 9 and 18. | / | / | / | |
| McCauley et al., 2017 | Grade 3-5: 16 Grade 6-8: 19 Grade 9-11: 9 ASD: 44 (38/6) TD: 36 (23/13) | ASD: M = 12.78 SD = 2.10 TD: M = 12.83 SD = 2.25 | WIAT-III | WIAT-III Numerical operations: ASD: M = 99.45 SD = 17.85 TD: M = 113.67 SD = 17.56  WIAT-III Problem solving: ASD: M = 98.75 SD = 19.49 TD: M = 119.00 SD = 16.00 | WASI-II | ASD: M = 98.77 SD = 14.21 TD: M = 114.83 SD = 13.92 | ASD: M = 96.11 SD = 15.52 TD: M = 109.80 SD = 14.50 | ASD: \ TD: \ | r = 0.430 (FSIQ) | ADOS-2 total:  M = 10.45 SD = 2.75 | / | / | |
| Tops et al., 2017 | ASD: 26(20/6) TD: 53(21/32) | R = 18.3-22.8 ASD: M = 19.90 SD = 1.40 TD: M = 19.20 SD = 0.77 | TTR | ASD: M = 138.31 SD = 32.26 TD: M = 146.34 SD = 21.57 | KAIT | ASD: M = 113.31 SD = 11.54 TD: M = 110.43 SD = 9.96 | ASD: \ TD: \ | ASD: \ TD: \ | / | / | / |
| Chen et al., 2018 | ASD: 114 (114/0) TD: 96 (96/0) | R = 7- 12 ASD: M = 9.67 SD = 1.49 TD: M = 9.39 SD = 1.09 | WIAT-II | Numerical Operations: ASD: M = 104.74 SD = 24.46 TD: M = 111.48 SD = 19.45  Mathematical Reasoning: ASD: M = 107.63 SD = 21.13 TD: M = 113.33 SD = 16.38 | WAIS | ASD: M = 107.75 SD = 17.91 TD: M = 110.15 SD = 16.28 | ASD: M = 105.78 SD = 17.49 TD: M = 110.15 SD = 18.21 | ASD: M = 108.23 SD = 19.90 TD: M = 108.01 SD = 15.36 | ASD: r = 0.48 (FSIQ) TD: r = 0.46 (FSIQ) | ADOS Module 3 Communication:  M = 3.32  SD = 1.56  Repetitive Behaviors:  M = 1.70  SD = 1.37  Social:  M = 8.27  SD = 2.07  Imagination/ Creativity:  M = 0.69  SD = 0.67 | M = 7.06  SD = 1.80 | / | |
| Brown et al., 2019 | ASD: 27 TD: \ | ASD: \ TD: \ | / | Applications: ASD: M = 98.77 SD = 25.81 TD: \  Operations: ASD: M = 94.96 SD = 25.09  TD: \ | / | ASD: \ TD: \ | ASD: \ TD: \ | ASD: \ TD: \ | / | / | / | / | |
| Hetzroni et al., 2019 | ASD: 20 (16/4)  TD: 20 (11/9) | ASD: M = 10.30 SD = 0.99 TD: M = 9.95 SD = 1.03 | CEN | ASD: M = 69.10 SD = 49.54 TD: M = 57.10 SD = 49.66 | Raven’s Colored Progressive Matrices Test | ASD: \ TD: \ | ASD: \ TD: \ | ASD: M = 93.40 SD = 23.29 TD: M = 101.00 SD = 20.67 | / | / | / | / | |
| Mayes et al., 2019 | ASD: 164 (152/12)  TD: \ | ASD: M = 8.70 SD = 2.00 TD: \ | WIAT WIAT-II | ASD: M = 101.20 SD = 15.10 TD: \ | WISC-III WISC-IV | ASD: M = 104.90 SD = 14.00 TD: \ | ASD: \ TD: \ | ASD: \ TD: \ | About 2.4% of the autistic students had academic overachievement while 15.2% had underachievement in math | / | / | Some participants with autism also had ADHD diagnosis. | |
| Alallawi, 2020 | ASD: 3 (3/0) TD: \ | ASD: M = 5.67 SD = 0.25 TD: \ | TEMA-3 | ASD: M = 72.00 SD = 17.52 TD: \ | / | ASD: \ TD: \ | ASD: \ TD: \ | ASD: \ TD: \ | / | / | / | / | |
| Bullen et al., 2020 | ASD: 77 (63/14)  TD: 43 (27/15) | ASD: M = 11.38 R = 8- 15  TD: M = 11.60 SD = 2.28 | WIAT-III | Numerical Operations: ASD: M = 96.70 SD = 17.20  TD: M = 117.30 SD = 17.00  Problem Solving: ASD:  M = 102.30 SD = 17.90  TD: M = 116.80 SD = 17.20 | WASI-II | ASD: M = 98.60 SD = 11.95 TD: M = 115.35 SD = 9.46 | ASD: M = 96.97 SD = 8.46 TD: M = 110.57 SD = 8.56 | ASD: M = 100.40 SD = 17.76 TD: M = 117.26 SD = 14.71 | r = 0.32 (VIQ) | / | / | / | |
| Howard, 2020 | ASD: 28 (26/2)  TD: \ | ASD:  M = 10.68 SD = \  TD: \ | KeyMath-3 | ASD: M = 94.79 SD = 23.17 TD: \ | / | ASD: \ TD: \ | ASD: \ TD: \ | ASD: M = 101.43  SD = 18.65 TD: \ | / | / | / | Eight participants with ADHD, 7 anxiety disorders, 3 Sensory Processing Disorder, 2 Speech/Language Disorder, 1 Depression, 1 obsessive-compulsive disorder, 1 Learning Disability, and 1 with Tourette’s Syndrome | |
| Iuculano et al., 2020 | ASD: 16(15/1)   TD: 16(15/1) | ASD:  M = 9.46 R: 7- 12  TD:  M = 9.83 SD = 1.75 | WIAT-II | Numerical Operations: ASD: M = 116.88 SD = 21.77 TD: M = 106.37 SD = 17.22  Math Reasoning: ASD: M = 123.25 SD = 17.51 TD: M = 115.31 SD = 14.37 | WASI | ASD: M = 120.25 SD = 15.25 TD: M = 120.31 SD = 11.72 | ASD: M = 117.31 SD = 16.39 TD: M = 121.88 SD = 11.19 | ASD: M = 119.00 SD = 19.83 TD: M = 114.37 SD = 15.91 | r = 0.042(FSIQ)  r = 0.006(VIQ) r = 0.031(NVIQ) | ADOS total  M = 12.93 SD = \ | / | / | |
| Kim et al., 2020 | ASD: 35 (25/10) TD: \ | ASD: M = 5.19 SD = 0.37 TD: \ | WJ-III-ACH | ASD: M = 104.70 SD = 14.20 TD: \ | DAS | ASD: M = 97.70 SD = 13.10 TD: \ | ASD: \ TD: \ | ASD: \ TD: \ | / | / | M = 7.71 SD = 1.90 | / | |
| McDougal et al., 2020 | ASD: 22 (18/4)  TD: 59 (32/27) | ASD:  M = 11.1 R: 6.08-16.00 TD:  M = 9.00 SD = 1.22 | WIAT-II | ASD: M = 82.77 SD = 25.11 TD: M = 104.35 SD = 15.76 | WASI-II | ASD: M = 91.09 SD = 14.82 TD: M = 98.28 SD = 12.07 | ASD: \ TD: \ | ASD: \ TD: \ | r = 0.795(FSIQ) | / | / | / | |
| Zaidman-Zait et al., 2020 | ASD: Elevated group: 54 (46/8) Low group: 43 (39/4) Low Academic but Average Social group: 44 (40/4) Average Academic but Low Social group: 37 (32/5)  TD: \ | ASD: M = 10.60 SD = 5.70 TD: \ | WIAT-II | WIAT-II-A Numerical operations ASD: Elevated group: M = 100.31 SD = 20.48  Low group: M = 54.40 SD = 14.44  Low Academic but Average Social group: M = 70.55 SD = 12.96  Average Academic but Low Social group: M = 88.00 SD = 15.50   TD: \ | WISC-IV | ASD: \ TD: \ | ASD: \ TD: \ | ASD: Elevated group: M = 98.51 SD = 14.67  Low group: M = 43.42 SD = 13.55  Low Academic but Average Social group: M = 68.65 SD = 11.35  Average Academic but Low Social group: M = 87.06 SD = 14.69   TD: \ | / | / | Elevated group: M = 4.96 SD = 2.62  Low group: M = 8.15 SD = 1.79  Low Academic but Average Social group: M = 7.64 SD = 2.26  Average Academic but Low Social group: M = 6.27 SD = 2.65 | / | |
| Alallawi et al., 2022 | ASD: 3 (3/0)  TD:  \ | ASD: M = 5.67 SD = 0.38 R = 5.33-6.08  TD: \ | TEMA-3 | ASD: M = 72.00 SD = 17.52  TD: \ | / | ASD: \ TD: \ | ASD: \ TD: \ | ASD: \ TD: \ | / | / | / | / | |
| Bullen et al., 2022 | ASD: Lower achievement: 55 (43/12)  Higher achievement: 22(20/3)  TD: \ | Lower achievement:  M = 11.16  Higher achievement:  M = 11.74 | WIAT-III | ASD: Problem solving: Lower achievement: M = 90.56 SD = 14.26 Higher achievement: M = 109.65 SD = 17.48  Numerical Operations: Lower achievement: M = 97.04 SD = 15.55 Higher achievement: M = 115.17 SD = 24.78  TD: \ | WASI-II | ASD: Lower achievement: M = 95.87 SD = 12.46  Higher achievement: M = 110.87 SD = 12.05  TD: \ | ASD: Lower achievement: M = 92.07 SD = 13.88  Higher achievement: M = 106.17 SD = 13.24  TD: \ | ASD: Lower achievement: M = 101.13 SD = 14.65  Higher achievement: M = 113.91 SD = 16.46  TD: \ | / | / | / | Lower achievement:  20 ADHD   Higher achievement: 2 ADHD | |
| Higashionna et al., 2022 | ASD: 20 TD: 20 | ASD:  M = 8.6 R: 6 - 12  TD:  M = 8.40 SD = 1.40 | K-ABCII | ASD: M = 98.90 SD = 19.50 TD: \ | / | ASD: M = 96.90 SD = 15.90 TD: \ | ASD: \ TD: \ | ASD: \ TD: \ | / | / | / | / | |
| Vostanis et al., 2022 | ASD: 4 (4/0)  TD: \ | ASD: M = 11.50 SD = 2.52  R = 8.00 - 14.00  TD: \ | TOMA-3 | ASD: M = 88  .50 SD = 11.90  TD: \ | / | ASD: \ TD: \ | ASD: \ TD: \ | ASD: \ TD: \ | / | / | / | / | |
| Wang et al., 2022 | ASD: 24 (11/13) Age 3: 3  Age 4: 10  Age 5: 4  Age 6: 7   TD: 24 Age: 3 Age 4: 10 Age 5: 4 Age 6: 7 | ASD:  M = 3/4/5/6 M = 4.63  TD: M = 3/4/5/6 SD = \ | TEMA-3 ANS Acuity | Early Mathematics Ability: Age 3: ASD: M = 11.33 SD = 9.07 TD: M = 21.33 SD = 6.03  Age 4: ASD: M = 9.00 SD = 8.46 TD: M = 26.40 SD = 9.68  Age 5: ASD: M = 18.25 SD = 11.96 TD: M = 43.75 SD = 7.18  Age 6: ASD: M = 21.86 SD = 14.31 TD: M = 50.29 SD = 10.53  ANS Acuity: Age 3: ASD: M = 0.72 SD = 0.10 TD: M = 0.87 SD = 0.05  Age 4: ASD: M = 0.61 SD = 0.07 TD: M = 0.93 SD = 0.04  Age 5: ASD: M = 0.67 SD = 0.05 TD: M = 0.97 SD = 0.01  Age 6: ASD: M = 0.68 SD = 0.15 TD: M = 0.93 SD = 0.04 | WPPSI-III | ASD: \ TD: \ | Age 3: ASD: M = 55.57 SD = 12.46 TD: M = 125.00 SD = 4.58  Age 4: ASD: M = 63.40 SD = 7.69 TD: M = 126.40 SD = 12.49  Age 5: ASD: M = 77.75 SD = 10.31 TD: M = 116.25 SD = 10.97  Age 6: ASD: M = 79.67 SD = 8.74 TD: M = 134.00 SD = 10.46 | Age 3: ASD: M = 63.00 SD = 21.28 TD: M = 117.00 SD = 14.00  Age 4: ASD: M = 72.20 SD = 15.45 TD: M = 131.70 SD = 5.89  Age 5: ASD: M = 74.25 SD = 8.96 TD: M = 127.75 SD = 6.29  Age 6: ASD: M = 95.00 SD = 22.07 TD: M = 121.43 SD = 5.41 | / | / | / | / | |
| Cooper & Farkas, 2023 | ASD: 157 Below Average Math Scores: 81 Above Average Math Scores: 76  TD: 15038 Below Average Math Scores: 3644 Above Average Math Scores: 11394 | / | / | School Math Test:  Below Average Math Scores: ASD: M = -1.489 SD = 0.568 TD: M = -1.153 SD = 0.522  Above Average Math Scores: ASD: M = 0.459 SD = 0.753 TD: M = 0.540 SD = 0.709  Final Math GPA:  Below Average Math Scores: ASD: M = 1.873 SD = 0.821 TD: M = 1.810 SD = 0.839  Above Average Math Scores: ASD: M = 2.616 SD = 0.102 TD: M = 2.694 SD = 0.008 | / | ASD: \ TD: \ | ASD: \ TD: \ | ASD: \ TD: \ | / | / | / | / | |
| Kljajevic, 2023 | ASD: 48 (43/5)  TD: 19 (19/0) | ASD: M = 8.27 SD = 1.45  TD: M = 8.95 SD = 1.47 | WIAT-II | ASD: M = 101.18 SD = 21.36  TD: M = 115.63 SD = 12.90 | WIAT-II | ASD: \ TD: \ | ASD: M = 102.77 SD = 17.27  TD: M = 121.47 SD = 13.37 | ASD: \ TD: \ | r = 0.686 (VIQ) | ADOS Social: M = 7.00 SD = 2.23  ADOS Communication: M = 2.71 SD = 1.73 | / | 30 children had depression, obsessive compulsive disorder, generalized anxiety disorder, phobia, transient/chronic vocal tic disorder, ADHD, or some combination of these conditions. | |
| Li et al., 2023 | ASD: 70 (64/6)  TD: 117 (63/54) | ASD: M = 5.20 SD = 0.54  TD: M = 5.11 SD = 0.42 | / | Approximate number comparison (ANS):  ASD: M = 0.74 SD = 0.20  TD: M = 0.88 SD = 0.08 | WPPSI-IV | ASD: M = 91.74 SD = 17.86  TD: \ | ASD: \ TD: \ | ASD: \ TD: \ | r = 0.537 (NVIQ) | / | M = 8.27 SD = 1.80 | / | |
| García-Moya et al., 2023 | ASD: 3 (3/0)  TD: \ | ASD: M = 8.52 SD = 0.19 R = 8.30-8.67 | TEMA-3 | ASD: M = 54.67 SD = 10.41 | WISC-V | ASD: M = 82.33 SD = 11.02  TD:  \ | ASD: M = 89.33 SD = 19.14  TD:  \ | ASD:  \  TD:  \ | r = 0.189 (FSIQ)  r = 0.874 (VIQ) | / | / | / | |
| Vostanis et al., 2023 | ASD: 3 (3/0)  TD: \ | ASD: M = 9.19 SD = 0.46  R = 8.67 – 9.50 | TOMA-3 | ASD: M = 101.67 SD = 18.88 | / | ASD: \ TD: \ | ASD: \ TD: \ | ASD: \ TD: \ | / | / | / | / | |
| Wei et al., 2023 | ASD: Unaccommodated autistic students: 70 (58/12) Extended-time accommodation autistic students: 80 (65/15)  TD: 24870 (12187/12683) | ASD: Unaccommodated autistic students: M = 14.48 SD = 0.50 Extended-time accommodation autistic students: M = 14.61 SD = 0.61  TD: M = 14.39 SD = 0.53 | / | National Assessment of Educational Progress Math test:  ASD: Unaccommodated autistic students: M = 8.96 SD = 5.50 Extended-time accommodation autistic students: M = 7.51 SD = 5.45  TD: M = 9.16 SD = 4.68 | / | ASD: \ TD: \ | ASD: \ TD: \ | ASD: \ TD: \ | / | / | / | / | |
| Polo‑Blanco et al., 2024 | ASD: 26 (23/3)  TD: 26 (23/3) | ASD: M = 9.35 SD = 2.06 R = 6.25 - 12.92  TD: M = 9.41 SD = 1.96 R = 6.25 - 12.42 | TEMA-3 MPI | TEMA-3 Score: ASD: M = 54.00 SD = 13.15 TD: M = 62.81 SD = 10.19  TEMA-3 Mathematical age: ASD: M = 7.56 SD = 1.10 TD: M = 8.38 SD = 0.93  MPI Mathematical Problem Solving Scores: ASD: M = 1.98 SD = 1.34 TD: M = 2.35 SD = 1.38  MPI Mathematical Problem Solving Accuracy: ASD: M = 0.35 SD = 0.38 TD:  M = 0.50 SD = 0.28 | WISC | ASD: M = 89.88 SD = 11.78   TD: M = 102.00 SD = 10.98 | ASD: \ TD: \ | ASD: \ TD: \ | / | / | / | / | |

| Note. IQ = intelligence quotient. F = full-scale IQ. V = verbal IQ. NV = non-verbal IQ. M = mean. R = range. CEN = Creating Equal Number Task (Tsamir et al. 2009). CPM = Computerized Progressive Matrices (Raven et al., 2008). DAS = The Differential Ability Scales (Elliott, 1990). KAIT = Kaufman Adolescent and Adult Intelligence Test (Dekker et al., 2004). KBIT-2 = Kaufman Brief Intelligence Test, Second Edition (Kaufman & Kaufman, 2004). K-TEA = Kaufman Test of Educational Achievement (Kaufman & Kaufman, 1985). KTEA-II = Kaufman Test of Educational Achievement, Second Edition (Kaufman & Kaufman, 2004). MWPS = mathematical word problem solving (Griffin & Jitendra, 2009; Jitendra et al., 1998). SBIS-IV = Stanford–Binet Intelligence Scale–IV (Farag, 2011). TOMA-2 = Test of mathematical abilities (2nd ed.) (Brown, 1994). TOMA-3: Test of Mathematical Abilities-3rd edition (Brown et al., 2013). TOMA-2-SP = Story Problem subtest of the Test of mathematical abilities (2nd ed.) (Brown, 1994). TTR = Tempo Test Rekenen (de Vos, 1992). WAIS = Wechsler Adult Intelligence Scale Manual (Wechsler, 1955). WAIS-III = Wechsler Adult Intelligence Scale (3rd ed.) (Wechsler, 1997). WAIS-R = Wechsler Adults Intelligence Scale-revised (Bartfai et al., 1992; Wechsler, 1981). WASI = The Wechsler Abbreviated Scale of Intelligence (Wechsler, 1999). WASI-II = The Wechsler Abbreviated Scale of Intelligence, Second Edition (Wechsler & Hsiao-Pin, 2011).WIAS-III = Wechsler Individual Achievement Scales, III (Wechsler, 2009). WIAT = Wechsler Individual Achievement Test (Psychological Corp., 1992). WIAT-II = Wechsler Individual Achievement Test-Second Edition (Johnson, 2011). WIAT-III = Wechsler Individual Achievement Test- Third Edition (Breaux & Frey, 2010). WISC = Wechsler intelligence scale for children (Wechsler, 1949). WISC-III = Wechsler Intelligence Scale for Children–III (Wechsler, 1991). WISC-IV = Wechsler Intelligence Scale for Children–IV (Wechsler, 2003). WISC-V = Wechsler Intelligency Scale for children–5th edition (Wechsler, 2015). WISC-R = Wechsler Adult Intelligence Scale-Revised (Wechsler, 1981). WJ-III-ACH = Woodcock-Johnson III Tests of Achievement (Mather, & Woodcock, 2001). WOND = Wechsler Objective Numerical Dimensions (Rust, 1993). WPPSI-III = Wechsler Preschool and Primary School Intelligence III (Wechsler, 2004). WPPSI-IV = Wechsler Preschool and Primary Scaleof Intelligence Fourth Edition (Wechsler, 2003). WRAT = The Wide Range Achievement Test (Jastak & Jastak, 1965). WRAT-R = Wide Range Achievement Test Revised (Jastak & Jastak, 1984). WRAT-3 = Wide Range Achievement Test-3 (Wilkinson, 1993). TEMA-3 = Test of Early Mathematics Ability, 3rd edition (Ginsburg & Baroody, 2003). Leiter-R = Leiter International Performance Scale-Revised (Roid & Miller, 1997). KeyMath-3 = KeyMath-3 Diagnostic Assessment (Connolly, 2007). MPI = Mathematical Problem Instrument (Mulligan & Mitchelmore, 1997). |
| --- |
