# Supplementary material for: The Proficiency and Variability of Mathematical Ability in Populations with Autism Spectrum Disorder: A Meta-analysis
Source: Research Square preprint supplement (doi:10.21203/rs.3.rs-5667808/v1), 2025-01-06
Supplement: Supplementary file 4 [file Code_compare_MATH_generalmath_Forvariability_adjustIQ---cr.pdf › R code/Code_compare_MATH_generalmath_Forvariability_adjustIQ---cr.pdf]

# IQ\_Math

## Contents

|          |                                                      |          |
|----------|------------------------------------------------------|----------|
| <b>1</b> | <b>Preparation</b>                                   | <b>1</b> |
| <b>2</b> | <b>Math ability: ASD versus TD controls</b>          | <b>1</b> |
| 2.1      | Meta-analysis of Standardized mean difference (SMD)  | 1        |
| 2.1.1    | Data preparation                                     | 1        |
| 2.1.2    | Meta-analysis with RVE                               | 4        |
| 2.1.3    | Moderator Analysis (meta-regression) with RVE        | 4        |
| 2.2      | Meta-analysis of variability (log SD ratio) with RVE | 6        |
| 2.2.1    | Data preparation                                     | 6        |
| 2.2.2    | Meta-analysis with RVE                               | 6        |
| 2.2.3    | Moderator Analysis (meta-regression) with RVE        | 6        |

## 1 Preparation

```
## Load packages & Customized R functions
library(metafor)
library(robumeta)
library(xlsx)      # read in .xlsx files
library(psychmeta) # range restriction and unreliability correction

## set working directory
wd <- "D:/Research/2020/Meta Child/2024/RCode"
setwd(wd)          # set working directory

## Read in data
dall = read.xlsx('ASD meta-analysis data0405all.xlsx',1)
#summary(dall)     # take a look at the data
```

## 2 Math ability: ASD versus TD controls

### 2.1 Meta-analysis of Standardized mean difference (SMD)

#### 2.1.1 Data preparation

```
#### Data Preparation
#-----
# ### Only studies with control groups were included
# remove studies not available to compute hedges g
var.sel = c('mathscores', 'SDmathscores', 'n', 'control.group.mathscores.mean',
            'control.group.mathscores.SD', 'control.group.N')
del = which(is.na(dall[,var.sel]),arr.ind = T)
del = unique(del[,1])
dsub = dall[-del,]
```

```

# Compute effect sizes for math
rr.math = dsub$Cronbach_math
id = dsub$id # study labels
Nstudy = nrow(dsub) # number of primary studies
x1 = dsub$mathscores # group means
x2 = dsub$control.group.mathscores.mean
n1 = dsub$n # sample sizes
n2 = dsub$control.group.N
s1 = dsub$SDmathscores # group SDs
s2 = dsub$control.group.mathscores.SD
sp = sqrt(((n1-1)*s1^2+(n2-1)*s2^2)/(n1+n2-2))
tmp = escalc(measure = 'SMD', m1i = x1, sd1i = s1, n1i=n1,
             m2i = x2, sd2i = s2, n2i=n2)

hedgesgmath = tmp$yi # unbiased effect sizes for math: hedge's g
vimath = tmp$vi # sampling variances of effect sizes for math

group = dsub$group #For Multivariate meta-analysis with dependent effect sizes

#### Compute effect sizes for IQs

## For fIQ
id = dsub$id # study labels
Nstudy = nrow(dsub) # number of primary studies
x1 = dsub$fsiq # group means
x2 = dsub$control.group.fsiq
n1 = dsub$n # sample sizes
n2 = dsub$control.group.N
s1 = dsub$SDfsiq # group SDs
s2 = dsub$control.group.SDfsiq
sp = sqrt(((n1-1)*s1^2+(n2-1)*s2^2)/(n1+n2-2))
tmp = escalc(measure = 'SMD', m1i = x1, sd1i = s1, n1i=n1,
             m2i = x2, sd2i = s2, n2i=n2)

hedgesg = tmp$yi # unbiased effect sizes: hedge's g
vi = tmp$vi # sampling variances of effect sizes
fIQ.hedgesg.c = hedgesg

## For vIQ
id = dsub$id # study labels
Nstudy = nrow(dsub) # number of primary studies
x1 = as.numeric(dsub$viq) # group means
x2 = dsub$control.group.viq
n1 = dsub$n # sample sizes
n2 = dsub$control.group.N
s1 = dsub$SDviq # group SDs
s2 = dsub$control.group.SDviq
sp = sqrt(((n1-1)*s1^2+(n2-1)*s2^2)/(n1+n2-2))
tmp = escalc(measure = 'SMD', m1i = x1, sd1i = s1, n1i=n1,
             m2i = x2, sd2i = s2, n2i=n2)

hedgesg = tmp$yi # unbiased effect sizes: hedge's g
vi = tmp$vi # sampling variances of effect sizes
vIQ.hedgesg.c = hedgesg

## For nvIQ

```

```

id = dsub$id                      # study labels
Nstudy = nrow(dsub)               # number of primary studies
x1 = dsub$nviq                    # group means
x2 = dsub$control.group.nviq
n1 = dsub$n                       # sample sizes
n2 = dsub$control.group.N
s1 = dsub$SDnviq                  # group SDs
s2 = dsub$control.group.SDnviq
sp = sqrt(((n1-1)*s1^2+(n2-1)*s2^2)/(n1+n2-2))
tmp = escalc(measure = 'SMD', m1i = x1, sd1i = s1, n1i=n1,
              m2i = x2, sd2i = s2, n2i=n2)
hedgesg = tmp$yi                  # unbiased effect sizes: hedge's g
vi = tmp$vi                       # sampling variances of effect sizes
nvIQ.hedgesg.c = hedgesg

#### Organize moderators
Age = dsub$age
Age = Age - mean(Age, na.rm = T)

PubYear = dsub$PubYear - min(dsub$PubYear)

Severity = dsub$calibrated.severity.scores
Severity = Severity - mean(Severity, na.rm = T)

fIQASD = dsub$fsiq-100
vIQASD = as.numeric(dsub$viq)-100
nvIQASD = dsub$nviq-100

fIQTD = dsub$control.group.fsiq-100
vIQTD = as.numeric(dsub$control.group.viq)-100
nvIQTD = dsub$control.group.nviq-100

bg.fIQ = data.frame(fIQASD=fIQASD, fIQTD = fIQTD)
bg.vIQ = data.frame(vIQASD=vIQASD, vIQTD = vIQTD)
bg.nvIQ = data.frame(nvIQASD=nvIQASD, nvIQTD = nvIQTD)

AgexfIQ = data.frame(Age = scale(Age), fIQASD = scale(fIQASD),
                     Interaction = scale(Age)*scale(fIQASD))
AgexvIQ = data.frame(Age = scale(Age), vIQASD = scale(vIQASD),
                     Interaction = scale(Age)*scale(vIQASD))
AgexnvIQ = data.frame(Age = scale(Age), nvIQASD = scale(nvIQASD),
                     Interaction = scale(Age)*scale(nvIQASD))

gender = dsub$gender.ratio
gender = gender - mean(gender, na.rm = T)

modsl = list(Age = Age, Publication.Year = PubYear, ASD.Severity = Severity,
             genderratio = gender,
             bg.fIQ=bg.fIQ, bg.vIQ=bg.vIQ, bg.nvIQ=bg.nvIQ,
             AgexfIQ=AgexfIQ, AgexvIQ=AgexvIQ, AgexnvIQ=AgexnvIQ,
             fIQd = as.numeric(fIQ.hedgesg.c), vIQd = as.numeric(vIQ.hedgesg.c),
             nvIQd = as.numeric(nvIQ.hedgesg.c) )

```

### 2.1.2 Meta-analysis with RVE

```
dat.hedgesgmth = data.frame(hedgesgmth,vimath,id)
fit0 = robu(formula = hedgesgmth ~ 1, data = dat.hedgesgmth,
            studynum = id,var.eff.size = vimath,
            modelweights = "CORR", small = TRUE)
fit0$reg_table
```

```
##          labels      b.r      SE      t      dfs      prob      CI.L
## 1 X.Intercept. -0.67605 0.1413047 -4.784341 37.59174 2.654887e-05 -0.9622085
##          CI.U sig
## 1 -0.3898915 ***
```

### 2.1.3 Moderator Analysis (meta-regression) with RVE

```
mods.names = names(modsl)
Mod.res = matrix(NA,1,9)
colnames(Mod.res) = c("labels","b.r","SE","t",
                     "dfs","prob","CI.L","CI.U","sig" )
Mod.res = as.data.frame(Mod.res)
for(mi in 1:length(mods.names)){
  mod = as.matrix(modsl[[mi]])
  dat.tmp = cbind(dat.hedgesgmth,mod)
  fit.tmp = robu(formula = hedgesgmth ~ 1 + mod, data = dat.tmp,
                studynum = id,var.eff.size = vimath,
                modelweights = "CORR", small = TRUE)
  res.tmp = fit.tmp$reg_table
  res.tmp[1,1] = 'Intercept'
  nmod = ncol(mod)
  if(nmod == 1){
    res.tmp[2,1] = mods.names[mi]
  }else{
    res.tmp[2:(nmod+1),1] = colnames(mod)
  }
  Mod.res = rbind(Mod.res,res.tmp)
}
Mod.res[1,] = fit0$reg_table
Mod.res[1,1] = 'No moderator'
Mod.res
```

```
##          labels      b.r      SE      t      dfs      prob
## 1 No moderator -0.67605002 0.141304730 -4.7843411 37.591738 2.654887e-05
## 2 Intercept -0.53143513 0.096391573 -5.5132946 26.964491 7.729438e-06
## 3 Age 0.01941970 0.013765225 1.4107799 10.502655 1.872360e-01
## 4 Intercept 0.10807356 0.195012524 0.5541878 7.192178 5.962536e-01
## 5 Publication.Year -0.03082193 0.011084693 -2.7805850 10.151796 1.917377e-02
## 6 Intercept -0.46161587 0.200457563 -2.3028109 7.870970 5.076473e-02
## 7 ASD.Severity -0.03032513 0.292094485 -0.1038196 3.071244 9.237223e-01
## 8 Intercept -0.43866324 0.075674144 -5.7967388 27.816201 3.244117e-06
## 9 genderratio -0.39738991 0.432578040 -0.9186548 4.835568 4.017772e-01
## 10 Intercept -0.28818627 0.096644769 -2.9819127 8.618379 1.615022e-02
## 11 fIQASD 0.05198581 0.013193076 3.9403862 9.387108 3.135101e-03
## 12 fIQTD -0.03670274 0.009435817 -3.8897254 7.007878 5.964404e-03
## 13 Intercept -0.33991231 0.092988793 -3.6554115 9.341608 4.952998e-03
```

```

## 14      vIQASD  0.05352393 0.016393917  3.2648653  5.660975 1.864224e-02
## 15      vIQTD -0.02263020 0.010531678 -2.1487744  8.048676 6.369296e-02
## 16      Intercept -0.18662096 0.114954620 -1.6234316  8.219444 1.421441e-01
## 17      nvIQASD  0.04521654 0.013319737  3.3947023  6.725921 1.224651e-02
## 18      vIQTD -0.05434568 0.011728426 -4.6336726  7.323134 2.120725e-03
## 19      Intercept -0.46291776 0.073853473 -6.2680567 16.680560 9.267377e-06
## 20      Age -0.02599932 0.055399721 -0.4693041  6.199993 6.549032e-01
## 21      fIQASD  0.28531212 0.068862832  4.1431947  8.122850 3.133638e-03
## 22      Interation -0.15948347 0.044421634 -3.5902207  4.914754 1.617279e-02
## 23      Intercept -0.74963722 0.114113898 -6.5692018 13.515476 1.487362e-05
## 24      Age  0.10946294 0.089153356  1.2278050  6.272534 2.635929e-01
## 25      vIQASD  0.73120659 0.217829418  3.3567853  9.891824 7.391335e-03
## 26      Interation -0.08556844 0.329865539 -0.2594040  5.385327 8.049509e-01
## 27      Intercept -0.60605422 0.140195177 -4.3229321 15.538383 5.590177e-04
## 28      Age  0.09460271 0.100771642  0.9387831  4.904813 3.917328e-01
## 29      nvIQASD  0.45354755 0.213529299  2.1240530 12.134238 5.488927e-02
## 30      Interation -0.31933438 0.242416347 -1.3172972  5.764116 2.376768e-01
## 31      Intercept -0.23728777 0.100693456 -2.3565361 13.579811 3.404693e-02
## 32      fIQd  0.48798808 0.155166693  3.1449280  6.846486 1.674484e-02
## 33      Intercept -0.21517493 0.100612140 -2.1386578 20.245264 4.483077e-02
## 34      vIQd  0.41849370 0.106685487  3.9226863  3.766053 1.930656e-02
## 35      Intercept -0.23166677 0.092247356 -2.5113648 20.095851 2.067886e-02
## 36      nvIQd  0.70563466 0.067641306 10.4320082  3.212033 1.385799e-03
##      CI.L      CI.U sig
## 1  -0.96220855 -0.389891493 ***
## 2  -0.72922649 -0.333643776 ***
## 3  -0.01105332  0.049892725
## 4  -0.35057169  0.566718814
## 5  -0.05547020 -0.006173663 **
## 6  -0.92519419  0.001962447 *
## 7  -0.94781947  0.887169201
## 8  -0.59372086 -0.283605629 ***
## 9  -1.52083714  0.726057320
## 10 -0.50829655 -0.068075984 **
## 11  0.02232756  0.081644065 ***
## 12 -0.05900982 -0.014395660 ***
## 13 -0.54910080 -0.130723814 ***
## 14  0.01281986  0.094228005 **
## 15 -0.04689075  0.001630351 *
## 16 -0.45047993  0.077238006
## 17  0.01345831  0.076974771 **
## 18 -0.08183285 -0.026858520 ***
## 19 -0.61896259 -0.306872933 ***
## 20 -0.16050462  0.108505985
## 21  0.12693121  0.443693017 ***
## 22 -0.27427122 -0.044695724 **
## 23 -0.99521292 -0.504061524 ***
## 24 -0.10641035  0.325336226
## 25  0.24513198  1.217281209 ***
## 26 -0.91558708  0.744450202
## 27 -0.90397392 -0.308134529 ***
## 28 -0.16595842  0.355163850
## 29 -0.01112263  0.918217740 *
## 30 -0.91843994  0.279771185

```

```
## 31 -0.45388236 -0.020693172 **
## 32  0.11940279  0.856573372 **
## 33 -0.42488530 -0.005464564 **
## 34  0.11488751  0.722099881 **
## 35 -0.42403256 -0.039300973 **
## 36  0.49818972  0.913079604 ***

write.xlsx(Mod.res, 'GMath.xlsx', sheetName = 'vsTD.SMD', append = T)
```

## 2.2 Meta-analysis of variability (log SD ratio) with RVE

### 2.2.1 Data preparation

```
var.sel = c('SDmathscores', 'n', 'control.group.mathscores.SD', 'control.group.N')
del = which(is.na(dall[, var.sel]), arr.ind = T)
del = unique(del[, 1])
dsub = dall[-del, ]

group = dsub$group #For multivariate meta-analysis with dependent effect sizes

s1 = dsub$SDmathscores      # group SDs
s2 = dsub$control.group.mathscores.SD
n1 = dsub$n                 # sample sizes
n2 = dsub$control.group.N
yi = log(s1/s2)+1/2/(n1-1)-1/2/(n2-1)
vi = 1/2/(n1-1)+1/2/(n2-1)
```

### 2.2.2 Meta-analysis with RVE

```
dat.sdmath = data.frame(yi, vi, id)
fit0 = robu(formula = yi ~ 1, data = dat.sdmath,
            studynum = id, var.eff.size = vi,
            modelweights = "CORR", small = TRUE)
fit0$reg_table

##          labels          b.r          SE          t          dfs          prob          CI.L
## 1 X.Intercept.  0.3119509  0.05177691  6.024904  37.14031  5.728296e-07  0.2070543
##          CI.U sig
## 1 0.4168476 ***
```

### 2.2.3 Moderator Analysis (meta-regression) with RVE

```
mods.names = names(mods1)
Mod.res = matrix(NA, 1, 9)
colnames(Mod.res) = c("labels", "b.r", "SE", "t",
                     "dfs", "prob", "CI.L", "CI.U", "sig" )
Mod.res = as.data.frame(Mod.res)
for(mi in 1:length(mods.names)){
  mod = as.matrix(mods1[[mi]])
  dat.tmp = cbind(dat.sdmath, mod)
  fit.tmp = robu(formula = yi ~ 1 + mod, data = dat.tmp,
                studynum = id, var.eff.size = vi,
                modelweights = "CORR", small = TRUE)
  res.tmp = fit.tmp$reg_table
```

```

res.tmp[1,1] = 'Intercept'
nmod = ncol(mod)
if(nmod == 1){
  res.tmp[2,1] = mods.names[mi]
}else{
  res.tmp[2:(nmod+1),1] = colnames(mod)
}
Mod.res = rbind(Mod.res,res.tmp)
}
Mod.res[1,] = fit0$reg_table
Mod.res[1,1] = 'No moderator'
Mod.res

```

| ##    | labels           | b.r           | SE          | t            | dfs       |
|-------|------------------|---------------|-------------|--------------|-----------|
| ## 1  | No moderator     | 0.3119509452  | 0.051776913 | 6.024904331  | 37.140310 |
| ## 2  | Intercept        | 0.2780205362  | 0.051222218 | 5.427733257  | 26.571396 |
| ## 3  | Age              | -0.0016451069 | 0.009740958 | -0.168885537 | 10.815815 |
| ## 4  | Intercept        | 0.1529200429  | 0.114514149 | 1.335381211  | 7.404730  |
| ## 5  | Publication.Year | 0.0062086035  | 0.004802795 | 1.292706423  | 10.338370 |
| ## 6  | Intercept        | 0.3625320787  | 0.073744997 | 4.916022664  | 7.484890  |
| ## 7  | ASD.Severity     | 0.2057428310  | 0.119828662 | 1.716975114  | 3.013034  |
| ## 8  | Intercept        | 0.2570521545  | 0.048139697 | 5.339712819  | 27.038143 |
| ## 9  | genderratio      | 0.0013019584  | 0.241577487 | 0.005389403  | 4.679482  |
| ## 10 | Intercept        | 0.2393892589  | 0.068829350 | 3.478011306  | 8.634765  |
| ## 11 | fIQASD           | 0.0028674878  | 0.008320620 | 0.344624287  | 9.201920  |
| ## 12 | fIQTD            | -0.0001123425 | 0.010218465 | -0.010994066 | 6.743120  |
| ## 13 | Intercept        | 0.1744635071  | 0.057007205 | 3.060376454  | 8.786949  |
| ## 14 | vIQASD           | -0.0033249933 | 0.004285143 | -0.775935115 | 5.378511  |
| ## 15 | vIQTD            | 0.0077905612  | 0.004166143 | 1.869969542  | 8.073012  |
| ## 16 | Intercept        | 0.2393306194  | 0.071587430 | 3.343193336  | 8.244874  |
| ## 17 | nvIQASD          | -0.0044019540 | 0.004819948 | -0.913278276 | 7.521440  |
| ## 18 | vIQTD            | 0.0065237983  | 0.006781342 | 0.962021712  | 6.907498  |
| ## 19 | Intercept        | 0.2692155847  | 0.058322629 | 4.615971313  | 16.940535 |
| ## 20 | Age              | 0.0503346213  | 0.045656047 | 1.102474365  | 6.219089  |
| ## 21 | fIQASD           | -0.0591500641 | 0.068529171 | -0.863137020 | 8.046325  |
| ## 22 | Interation       | 0.1098887600  | 0.058990382 | 1.862825014  | 4.949811  |
| ## 23 | Intercept        | 0.2432838325  | 0.060128260 | 4.046081360  | 13.179537 |
| ## 24 | Age              | 0.0016753056  | 0.039213373 | 0.042722813  | 6.306497  |
| ## 25 | vIQASD           | -0.0174934496 | 0.094967954 | -0.184203711 | 10.295177 |
| ## 26 | Interation       | 0.0588797457  | 0.100526747 | 0.585712236  | 6.438281  |
| ## 27 | Intercept        | 0.3022137754  | 0.074282710 | 4.068426899  | 15.534669 |
| ## 28 | Age              | -0.0426910317 | 0.092411410 | -0.461967108 | 5.202426  |
| ## 29 | nvIQASD          | -0.0650014079 | 0.084575071 | -0.768564625 | 11.901346 |
| ## 30 | Interation       | -0.0033824937 | 0.115923715 | -0.029178617 | 6.574449  |
| ## 31 | Intercept        | 0.2544801430  | 0.052053581 | 4.888811446  | 12.998056 |
| ## 32 | fIQd             | 0.0486362593  | 0.088172399 | 0.551604130  | 6.174893  |
| ## 33 | Intercept        | 0.2099479231  | 0.045636969 | 4.600391482  | 18.033200 |
| ## 34 | vIQd             | -0.0468057750 | 0.039430987 | -1.187030280 | 3.207333  |
| ## 35 | Intercept        | 0.2495146175  | 0.059650947 | 4.182911260  | 21.141152 |
| ## 36 | nvIQd            | -0.0728821061 | 0.061934450 | -1.176761983 | 1.985978  |
| ##    | prob             | CI.L          | CI.U        | sig          |           |
| ## 1  | 5.728296e-07     | 0.207054332   | 0.416847559 | ***          |           |
| ## 2  | 1.017646e-05     | 0.172841845   | 0.383199227 | ***          |           |
| ## 3  | 8.690036e-01     | -0.023129439  | 0.019839225 |              |           |

```

## 4 2.213406e-01 -0.114891249 0.420731335
## 5 2.242554e-01 -0.004445404 0.016862611
## 6 1.419163e-03 0.190416996 0.534647161 ***
## 7 1.840892e-01 -0.174673930 0.586159592
## 8 1.218824e-05 0.158284176 0.355820133 ***
## 9 9.959220e-01 -0.632706898 0.635310815
## 10 7.415132e-03 0.082676712 0.396101806 ***
## 11 7.381225e-01 -0.015892291 0.021627266
## 12 9.915463e-01 -0.024463031 0.024238346
## 13 1.394464e-02 0.045026041 0.303900973 **
## 14 4.705158e-01 -0.014111177 0.007461190
## 15 9.807745e-02 -0.001801480 0.017382602 *
## 16 9.752462e-03 0.075099249 0.403561990 ***
## 17 3.894322e-01 -0.015641083 0.006837175
## 18 3.684973e-01 -0.009555162 0.022602758
## 19 2.486508e-04 0.146132681 0.392298488 ***
## 20 3.110813e-01 -0.060434602 0.161103845
## 21 4.130486e-01 -0.217020389 0.098720261
## 22 1.221185e-01 -0.042214474 0.261991994
## 23 1.350199e-03 0.113564274 0.373003391 ***
## 24 9.672432e-01 -0.093157227 0.096507838
## 25 8.574315e-01 -0.228275753 0.193288853
## 26 5.780106e-01 -0.183097786 0.300857278
## 27 9.444437e-04 0.144357232 0.460070319 ***
## 28 6.627828e-01 -0.277488743 0.192106679
## 29 4.571324e-01 -0.249444215 0.119441399
## 30 9.775880e-01 -0.281136698 0.274371710
## 31 2.960623e-04 0.142023509 0.366936777 ***
## 32 6.005974e-01 -0.165641189 0.262913707
## 33 2.210810e-04 0.114080861 0.305814986 ***
## 34 3.156385e-01 -0.167826215 0.074214665
## 35 4.145204e-04 0.125514095 0.373515140 ***
## 36 3.611024e-01 -0.341175769 0.195411557

```

```

write.xlsx(Mod.res,'GMath.xlsx',sheetName = 'vsTD.logSDR',append = T)

```
