# Supplementary material for: The Proficiency and Variability of Mathematical Ability in Populations with Autism Spectrum Disorder: A Meta-analysis
Source: Research Square preprint supplement (doi:10.21203/rs.3.rs-5667808/v1), 2025-01-06
Supplement: Supplementary file 5 [file Code_compare_MATH_generalmath_cr.pdf › R code/Code_compare_MATH_generalmath_cr.pdf]

# IQ\_Math

## Contents

|          |                                                      |          |
|----------|------------------------------------------------------|----------|
| <b>1</b> | <b>Preparation</b>                                   | <b>1</b> |
| <b>2</b> | <b>Math ability: ASD versus TD controls</b>          | <b>2</b> |
| 2.1      | Meta-analysis of Standardized mean difference (SMD)  | 2        |
| 2.1.1    | Data preparation                                     | 2        |
| 2.1.2    | Meta-analysis with RVE                               | 4        |
| 2.1.3    | Moderator Analysis (meta-regression) with RVE        | 4        |
| 2.2      | Meta-analysis of variability (log SD ratio) with RVE | 6        |
| 2.2.1    | Data preparation                                     | 6        |
| 2.2.2    | Meta-analysis with RVE                               | 6        |
| 2.2.3    | Moderator Analysis (meta-regression) with RVE        | 7        |
| <b>3</b> | <b>Math ability: ASD versus the norm group</b>       | <b>9</b> |
| 3.1      | Meta-analysis of SDM                                 | 9        |
| 3.1.1    | Data preparation                                     | 9        |
| 3.1.2    | Meta-analysis with RVE                               | 10       |
| 3.1.3    | Moderator Analysis (meta-regression) with RVE        | 10       |
| 3.2      | Meta-analysis of variability (log SD ratio)          | 12       |
| 3.2.1    | Data preparation                                     | 12       |
| 3.2.2    | Meta-analysis with RVE                               | 12       |
| 3.2.3    | Moderator Analysis (meta-regression) with RVE        | 12       |

## 1 Preparation

```
## Load packages & Customized R functions
library(metafor)      # package for meta-analyses
library(robumeta)
library(xlsx)         # read in .xlsx files
library(psychmeta)    # range restriction and unreliability correction

## set working directory
wd <- "D:/Research/2020/Meta Child/2024/RCode"
setwd(wd)             # set working directory

## Read in data
dall = read.xlsx('ASD meta-analysis data0405all.xlsx',1)
summary(dall)         # take a look at the data
```

## 2 Math ability: ASD versus TD controls

### 2.1 Meta-analysis of Standardized mean difference (SMD)

#### 2.1.1 Data preparation

```
#### Data Preparation
#-----
# ### Only studies with control groups were included
# remove studies not available to compute hedges g
var.sel = c('mathscores', 'SDmathscores', 'n', 'control.group.mathscores.mean',
            'control.group.mathscores.SD', 'control.group.N')
del = which(is.na(dall[,var.sel]), arr.ind = T)
del = unique(del[,1])
dsub = dall[-del,]

# Compute effect sizes for math
rr.math = dsub$Cronbach_math
id = dsub$id # study labels
Nstudy = nrow(dsub) # number of primary studies
x1 = dsub$mathscores # group means
x2 = dsub$control.group.mathscores.mean
n1 = dsub$n # sample sizes
n2 = dsub$control.group.N
s1 = dsub$SDmathscores # group SDs
s2 = dsub$control.group.mathscores.SD
sp = sqrt(((n1-1)*s1^2 + (n2-1)*s2^2) / (n1+n2-2))
tmp = escalc(measure = 'SMD', m1i = x1, sd1i = s1, n1i = n1,
             m2i = x2, sd2i = s2, n2i = n2)
hedgesgmath = tmp$yi # unbiased effect sizes for math: hedge's g
vimath = tmp$vi # sampling variances of effect sizes for math

group = dsub$group #For Multivariate meta-analysis with dependent effect sizes

#### Compute effect sizes for IQs

## For fIQ
id = dsub$id # study labels
Nstudy = nrow(dsub) # number of primary studies
x1 = dsub$fsiq # group means
x2 = dsub$control.group.fsiq
n1 = dsub$n # sample sizes
n2 = dsub$control.group.N
s1 = dsub$SDfsiq # group SDs
s2 = dsub$control.group.SDfsiq
sp = sqrt(((n1-1)*s1^2 + (n2-1)*s2^2) / (n1+n2-2))
tmp = escalc(measure = 'SMD', m1i = x1, sd1i = s1, n1i = n1,
             m2i = x2, sd2i = s2, n2i = n2)
hedgesg = tmp$yi # unbiased effect sizes: hedge's g
vi = tmp$vi # sampling variances of effect sizes
fIQ.hedgesg.c = hedgesg

## For vIQ
id = dsub$id # study labels
```

```

Nstudy = nrow(dsub)      # number of primary studies
x1 = as.numeric(dsub$viq) # group means
x2 = dsub$control.group.viq
n1 = dsub$n              # sample sizes
n2 = dsub$control.group.N
s1 = dsub$SDviq          # group SDs
s2 = dsub$control.group.SDviq
sp = sqrt(((n1-1)*s1^2+(n2-1)*s2^2)/(n1+n2-2))
tmp = escalc(measure = 'SMD', m1i = x1, sd1i = s1, n1i=n1,
              m2i = x2, sd2i = s2, n2i=n2)
hedgesg = tmp$yi         # unbiased effect sizes: hedge's g
vi = tmp$vi              # sampling variances of effect sizes
vIQ.hedgesg.c = hedgesg

## For nvIQ
id = dsub$id             # study labels
Nstudy = nrow(dsub)      # number of primary studies
x1 = dsub$nvIQ           # group means
x2 = dsub$control.group.nvIQ
n1 = dsub$n              # sample sizes
n2 = dsub$control.group.N
s1 = dsub$SDnvIQ         # group SDs
s2 = dsub$control.group.SDnvIQ
sp = sqrt(((n1-1)*s1^2+(n2-1)*s2^2)/(n1+n2-2))
tmp = escalc(measure = 'SMD', m1i = x1, sd1i = s1, n1i=n1,
              m2i = x2, sd2i = s2, n2i=n2)
hedgesg = tmp$yi         # unbiased effect sizes: hedge's g
vi = tmp$vi              # sampling variances of effect sizes
nvIQ.hedgesg.c = hedgesg

#### Organize moderators
Age = dsub$age
Age = Age - mean(Age, na.rm = T)

PubYear = dsub$PubYear - min(dsub$PubYear)

Severity = dsub$calibrated.severity.scores
Severity = Severity - mean(Severity, na.rm = T)

fIQASD = dsub$fsiq-100
vIQASD = as.numeric(dsub$viq)-100
nvIQASD = dsub$nvIQ-100

fIQTD = dsub$control.group.fsiq-100
vIQTD = as.numeric(dsub$control.group.viq)-100
nvIQTD = dsub$control.group.nvIQ-100

bg.fIQ = data.frame(fIQASD=fIQASD, fITD = fIQTD)
bg.vIQ = data.frame(vIQASD=vIQASD, vITD = vIQTD)
bg.nvIQ = data.frame(nvIQASD=nvIQASD, nvITD = nvIQTD)

AgexfIQ = data.frame(Age = scale(Age), fIQASD = scale(fIQASD),
                      Interaction = scale(Age)*scale(fIQASD))

```

```

AgexvIQ = data.frame(Age = scale(Age),vIQASD = scale(vIQASD),
                     Interation = scale(Age)*scale(vIQASD))
AgexnvIQ = data.frame(Age = scale(Age),nvIQASD = scale(nvIQASD),
                     Interation = scale(Age)*scale(nvIQASD))

gender = dsub$gender.ratio
gender = gender - mean(gender, na.rm = T)

modsl = list(Age = Age,Publication.Year = PubYear,ASD.Severity = Severity,
             genderratio = gender,
             bg.fIQ=bg.fIQ, bg.vIQ=bg.vIQ, bg.nvIQ=bg.nvIQ,
             AgexfIQ=AgexfIQ, AgexvIQ=AgexvIQ, AgexnvIQ=AgexnvIQ,
             fIQd = as.numeric(fIQ.hedgesg.c), vIQd = as.numeric(vIQ.hedgesg.c),
             nvIQd = as.numeric(nvIQ.hedgesg.c) )

```

### 2.1.2 Meta-analysis with RVE

```

dat.hedgesgmth = data.frame(hedgesgmth,vimath,id)
fit0 = robu(formula = hedgesgmth ~ 1, data = dat.hedgesgmth,
            studynum = id,var.eff.size = vimath,
            modelweights = "CORR", small = TRUE)
fit0$reg_table

##      labels      b.r      SE      t      dfs      prob      CI.L
## 1 X.Intercept. -0.67605 0.1413047 -4.784341 37.59174 2.654887e-05 -0.9622085
##      CI.U sig
## 1 -0.3898915 ***

```

### 2.1.3 Moderator Analysis (meta-regression) with RVE

```

mods.names = names(modsl)
Mod.res = matrix(NA,1,9)
colnames(Mod.res) = c("labels","b.r","SE","t",
                     "dfs" ,"prob","CI.L","CI.U","sig" )
Mod.res = as.data.frame(Mod.res)
for(mi in 1:length(mods.names)){
  mod = as.matrix(modsl[[mi]])
  dat.tmp = cbind(dat.hedgesgmth,mod)
  fit.tmp = robu(formula = hedgesgmth ~ 1 + mod, data = dat.tmp,
                studynum = id,var.eff.size = vimath,
                modelweights = "CORR", small = TRUE)
  res.tmp = fit.tmp$reg_table
  res.tmp[1,1] = 'Intercept'
  nmod = ncol(mod)
  if(nmod == 1){
    res.tmp[2,1] = mods.names[mi]
  }else{
    res.tmp[2:(nmod+1),1] = colnames(mod)
  }
  Mod.res = rbind(Mod.res,res.tmp)
}
Mod.res[1,] = fit0$reg_table

```

```
Mod.res[1,1] = 'No moderator'
Mod.res
```

| ##    | labels           | b.r          | SE          | t          | dfs       | prob         |
|-------|------------------|--------------|-------------|------------|-----------|--------------|
| ## 1  | No moderator     | -0.67605002  | 0.141304730 | -4.7843411 | 37.591738 | 2.654887e-05 |
| ## 2  | Intercept        | -0.53143513  | 0.096391573 | -5.5132946 | 26.964491 | 7.729438e-06 |
| ## 3  | Age              | 0.01941970   | 0.013765225 | 1.4107799  | 10.502655 | 1.872360e-01 |
| ## 4  | Intercept        | 0.10807356   | 0.195012524 | 0.5541878  | 7.192178  | 5.962536e-01 |
| ## 5  | Publication.Year | -0.03082193  | 0.011084693 | -2.7805850 | 10.151796 | 1.917377e-02 |
| ## 6  | Intercept        | -0.46161587  | 0.200457563 | -2.3028109 | 7.870970  | 5.076473e-02 |
| ## 7  | ASD.Severity     | -0.03032513  | 0.292094485 | -0.1038196 | 3.071244  | 9.237223e-01 |
| ## 8  | Intercept        | -0.43866324  | 0.075674144 | -5.7967388 | 27.816201 | 3.244117e-06 |
| ## 9  | genderratio      | -0.39738991  | 0.432578040 | -0.9186548 | 4.835568  | 4.017772e-01 |
| ## 10 | Intercept        | -0.28818627  | 0.096644769 | -2.9819127 | 8.618379  | 1.615022e-02 |
| ## 11 | fIQASD           | 0.05198581   | 0.013193076 | 3.9403862  | 9.387108  | 3.135101e-03 |
| ## 12 | fITD             | -0.03670274  | 0.009435817 | -3.8897254 | 7.007878  | 5.964404e-03 |
| ## 13 | Intercept        | -0.33991231  | 0.092988793 | -3.6554115 | 9.341608  | 4.952998e-03 |
| ## 14 | vIQASD           | 0.05352393   | 0.016393917 | 3.2648653  | 5.660975  | 1.864224e-02 |
| ## 15 | vITD             | -0.02263020  | 0.010531678 | -2.1487744 | 8.048676  | 6.369296e-02 |
| ## 16 | Intercept        | -0.18662096  | 0.114954620 | -1.6234316 | 8.219444  | 1.421441e-01 |
| ## 17 | nVQASD           | 0.04521654   | 0.013319737 | 3.3947023  | 6.725921  | 1.224651e-02 |
| ## 18 | nVTD             | -0.05434568  | 0.011728426 | -4.6336726 | 7.323134  | 2.120725e-03 |
| ## 19 | Intercept        | -0.46291776  | 0.073853473 | -6.2680567 | 16.680560 | 9.267377e-06 |
| ## 20 | Age              | -0.02599932  | 0.055399721 | -0.4693041 | 6.199993  | 6.549032e-01 |
| ## 21 | fIQASD           | 0.28531212   | 0.068862832 | 4.1431947  | 8.122850  | 3.133638e-03 |
| ## 22 | Interation       | -0.15948347  | 0.044421634 | -3.5902207 | 4.914754  | 1.617279e-02 |
| ## 23 | Intercept        | -0.74963722  | 0.114113898 | -6.5692018 | 13.515476 | 1.487362e-05 |
| ## 24 | Age              | 0.10946294   | 0.089153356 | 1.2278050  | 6.272534  | 2.635929e-01 |
| ## 25 | vIQASD           | 0.73120659   | 0.217829418 | 3.3567853  | 9.891824  | 7.391335e-03 |
| ## 26 | Interation       | -0.08556844  | 0.329865539 | -0.2594040 | 5.385327  | 8.049509e-01 |
| ## 27 | Intercept        | -0.60605422  | 0.140195177 | -4.3229321 | 15.538383 | 5.590177e-04 |
| ## 28 | Age              | 0.09460271   | 0.100771642 | 0.9387831  | 4.904813  | 3.917328e-01 |
| ## 29 | nvIQASD          | 0.45354755   | 0.213529299 | 2.1240530  | 12.134238 | 5.488927e-02 |
| ## 30 | Interation       | -0.31933438  | 0.242416347 | -1.3172972 | 5.764116  | 2.376768e-01 |
| ## 31 | Intercept        | -0.23728777  | 0.100693456 | -2.3565361 | 13.579811 | 3.404693e-02 |
| ## 32 | fIQd             | 0.48798808   | 0.155166693 | 3.1449280  | 6.846486  | 1.674484e-02 |
| ## 33 | Intercept        | -0.21517493  | 0.100612140 | -2.1386578 | 20.245264 | 4.483077e-02 |
| ## 34 | vIQd             | 0.41849370   | 0.106685487 | 3.9226863  | 3.766053  | 1.930656e-02 |
| ## 35 | Intercept        | -0.23166677  | 0.092247356 | -2.5113648 | 20.095851 | 2.067886e-02 |
| ## 36 | nvIQd            | 0.70563466   | 0.067641306 | 10.4320082 | 3.212033  | 1.385799e-03 |
| ##    | CI.L             | CI.U         | sig         |            |           |              |
| ## 1  | -0.96220855      | -0.389891493 | ***         |            |           |              |
| ## 2  | -0.72922649      | -0.333643776 | ***         |            |           |              |
| ## 3  | -0.01105332      | 0.049892725  |             |            |           |              |
| ## 4  | -0.35057169      | 0.566718814  |             |            |           |              |
| ## 5  | -0.05547020      | -0.006173663 | **          |            |           |              |
| ## 6  | -0.92519419      | 0.001962447  | *           |            |           |              |
| ## 7  | -0.94781947      | 0.887169201  |             |            |           |              |
| ## 8  | -0.59372086      | -0.283605629 | ***         |            |           |              |
| ## 9  | -1.52083714      | 0.726057320  |             |            |           |              |
| ## 10 | -0.50829655      | -0.068075984 | **          |            |           |              |
| ## 11 | 0.02232756       | 0.081644065  | ***         |            |           |              |
| ## 12 | -0.05900982      | -0.014395660 | ***         |            |           |              |
| ## 13 | -0.54910080      | -0.130723814 | ***         |            |           |              |

```
## 14 0.01281986 0.094228005 **
## 15 -0.04689075 0.001630351 *
## 16 -0.45047993 0.077238006
## 17 0.01345831 0.076974771 **
## 18 -0.08183285 -0.026858520 ***
## 19 -0.61896259 -0.306872933 ***
## 20 -0.16050462 0.108505985
## 21 0.12693121 0.443693017 ***
## 22 -0.27427122 -0.044695724 **
## 23 -0.99521292 -0.504061524 ***
## 24 -0.10641035 0.325336226
## 25 0.24513198 1.217281209 ***
## 26 -0.91558708 0.744450202
## 27 -0.90397392 -0.308134529 ***
## 28 -0.16595842 0.355163850
## 29 -0.01112263 0.918217740 *
## 30 -0.91843994 0.279771185
## 31 -0.45388236 -0.020693172 **
## 32 0.11940279 0.856573372 **
## 33 -0.42488530 -0.005464564 **
## 34 0.11488751 0.722099881 **
## 35 -0.42403256 -0.039300973 **
## 36 0.49818972 0.913079604 ***
```

```
write.xlsx(Mod.res, 'Math.xlsx', sheetName = 'vsTD.SMD', append = T)
```

## 2.2 Meta-analysis of variability (log SD ratio) with RVE

### 2.2.1 Data preparation

```
var.sel = c('SDmathscores', 'n', 'control.group.mathscores.SD', 'control.group.N')
del = which(is.na(dall[, var.sel]), arr.ind = T)
del = unique(del[, 1])
dsub = dall[-del, ]

group = dsub$group #For multivariate meta-analysis with dependent effect sizes

s1 = dsub$SDmathscores # group SDs
s2 = dsub$control.group.mathscores.SD
n1 = dsub$n # sample sizes
n2 = dsub$control.group.N
yi = log(s1/s2)+1/2/(n1-1)-1/2/(n2-1)
vi = 1/2/(n1-1)+1/2/(n2-1)
```

### 2.2.2 Meta-analysis with RVE

```
dat.sdmath = data.frame(yi, vi, id)
fit0 = robu(formula = yi ~ 1, data = dat.sdmath,
            studynum = id, var.eff.size = vi,
            modelweights = "CORR", small = TRUE)
fit0$reg_table
```

```
##          labels          b.r          SE          t          dfs          prob          CI.L
## 1 X.Intercept. 0.3119509 0.05177691 6.024904 37.14031 5.728296e-07 0.2070543
```

```
##          CI.U sig
## 1 0.4168476 ***
```

### 2.2.3 Moderator Analysis (meta-regression) with RVE

```
mods.names = names(mods1)
Mod.res = matrix(NA,1,9)
colnames(Mod.res) = c("labels","b.r","SE","t",
                      "dfs" ,"prob","CI.L","CI.U","sig" )
Mod.res = as.data.frame(Mod.res)
for(mi in 1:length(mods.names)){
  mod = as.matrix(mods1[[mi]])
  dat.tmp = cbind(dat.sdmath,mod)
  fit.tmp = robu(formula =yi ~ 1 + mod, data = dat.tmp,
                 studynum = id,var.eff.size = vi,
                 modelweights = "CORR", small = TRUE)
  res.tmp = fit.tmp$reg_table
  res.tmp[1,1] = 'Intercept'
  nmod = ncol(mod)
  if(nmod == 1){
    res.tmp[2,1] = mods.names[mi]
  }else{
    res.tmp[2:(nmod+1),1] = colnames(mod)
  }
  Mod.res = rbind(Mod.res,res.tmp)
}
Mod.res[1,] = fit0$reg_table
Mod.res[1,1] = 'No moderator'
Mod.res
```

| ##    | labels           | b.r           | SE          | t            | dfs       |
|-------|------------------|---------------|-------------|--------------|-----------|
| ## 1  | No moderator     | 0.3119509452  | 0.051776913 | 6.024904331  | 37.140310 |
| ## 2  | Intercept        | 0.2780205362  | 0.051222218 | 5.427733257  | 26.571396 |
| ## 3  | Age              | -0.0016451069 | 0.009740958 | -0.168885537 | 10.815815 |
| ## 4  | Intercept        | 0.1529200429  | 0.114514149 | 1.335381211  | 7.404730  |
| ## 5  | Publication.Year | 0.0062086035  | 0.004802795 | 1.292706423  | 10.338370 |
| ## 6  | Intercept        | 0.3625320787  | 0.073744997 | 4.916022664  | 7.484890  |
| ## 7  | ASD.Severity     | 0.2057428310  | 0.119828662 | 1.716975114  | 3.013034  |
| ## 8  | Intercept        | 0.2570521545  | 0.048139697 | 5.339712819  | 27.038143 |
| ## 9  | genderratio      | 0.0013019584  | 0.241577487 | 0.005389403  | 4.679482  |
| ## 10 | Intercept        | 0.2393892589  | 0.068829350 | 3.478011306  | 8.634765  |
| ## 11 | fIQASD           | 0.0028674878  | 0.008320620 | 0.344624287  | 9.201920  |
| ## 12 | fITD             | -0.0001123425 | 0.010218465 | -0.010994066 | 6.743120  |
| ## 13 | Intercept        | 0.1744635071  | 0.057007205 | 3.060376454  | 8.786949  |
| ## 14 | vIQASD           | -0.0033249933 | 0.004285143 | -0.775935115 | 5.378511  |
| ## 15 | vITD             | 0.0077905612  | 0.004166143 | 1.869969542  | 8.073012  |
| ## 16 | Intercept        | 0.2393306194  | 0.071587430 | 3.343193336  | 8.244874  |
| ## 17 | nVQASD           | -0.0044019540 | 0.004819948 | -0.913278276 | 7.521440  |
| ## 18 | nVTD             | 0.0065237983  | 0.006781342 | 0.962021712  | 6.907498  |
| ## 19 | Intercept        | 0.2692155847  | 0.058322629 | 4.615971313  | 16.940535 |
| ## 20 | Age              | 0.0503346213  | 0.045656047 | 1.102474365  | 6.219089  |
| ## 21 | fIQASD           | -0.0591500641 | 0.068529171 | -0.863137020 | 8.046325  |
| ## 22 | Interaction      | 0.1098887600  | 0.058990382 | 1.862825014  | 4.949811  |
| ## 23 | Intercept        | 0.2432838325  | 0.060128260 | 4.046081360  | 13.179537 |

```

## 24          Age  0.0016753056 0.039213373  0.042722813  6.306497
## 25          vIQASD -0.0174934496 0.094967954 -0.184203711 10.295177
## 26      Iteration  0.0588797457 0.100526747  0.585712236  6.438281
## 27      Intercept  0.3022137754 0.074282710  4.068426899 15.534669
## 28          Age -0.0426910317 0.092411410 -0.461967108  5.202426
## 29          nvIQASD -0.0650014079 0.084575071 -0.768564625 11.901346
## 30      Iteration -0.0033824937 0.115923715 -0.029178617  6.574449
## 31      Intercept  0.2544801430 0.052053581  4.888811446 12.998056
## 32          fIQd  0.0486362593 0.088172399  0.551604130  6.174893
## 33      Intercept  0.2099479231 0.045636969  4.600391482 18.033200
## 34          vIQd -0.0468057750 0.039430987 -1.187030280  3.207333
## 35      Intercept  0.2495146175 0.059650947  4.182911260 21.141152
## 36          nvIQd -0.0728821061 0.061934450 -1.176761983  1.985978
##          prob      CI.L      CI.U sig
## 1  5.728296e-07  0.207054332  0.416847559 ***
## 2  1.017646e-05  0.172841845  0.383199227 ***
## 3  8.690036e-01 -0.023129439  0.019839225
## 4  2.213406e-01 -0.114891249  0.420731335
## 5  2.242554e-01 -0.004445404  0.016862611
## 6  1.419163e-03  0.190416996  0.534647161 ***
## 7  1.840892e-01 -0.174673930  0.586159592
## 8  1.218824e-05  0.158284176  0.355820133 ***
## 9  9.959220e-01 -0.632706898  0.635310815
## 10 7.415132e-03  0.082676712  0.396101806 ***
## 11 7.381225e-01 -0.015892291  0.021627266
## 12 9.915463e-01 -0.024463031  0.024238346
## 13 1.394464e-02  0.045026041  0.303900973 **
## 14 4.705158e-01 -0.014111177  0.007461190
## 15 9.807745e-02 -0.001801480  0.017382602 *
## 16 9.752462e-03  0.075099249  0.403561990 ***
## 17 3.894322e-01 -0.015641083  0.006837175
## 18 3.684973e-01 -0.009555162  0.022602758
## 19 2.486508e-04  0.146132681  0.392298488 ***
## 20 3.110813e-01 -0.060434602  0.161103845
## 21 4.130486e-01 -0.217020389  0.098720261
## 22 1.221185e-01 -0.042214474  0.261991994
## 23 1.350199e-03  0.113564274  0.373003391 ***
## 24 9.672432e-01 -0.093157227  0.096507838
## 25 8.574315e-01 -0.228275753  0.193288853
## 26 5.780106e-01 -0.183097786  0.300857278
## 27 9.444437e-04  0.144357232  0.460070319 ***
## 28 6.627828e-01 -0.277488743  0.192106679
## 29 4.571324e-01 -0.249444215  0.119441399
## 30 9.775880e-01 -0.281136698  0.274371710
## 31 2.960623e-04  0.142023509  0.366936777 ***
## 32 6.005974e-01 -0.165641189  0.262913707
## 33 2.210810e-04  0.114080861  0.305814986 ***
## 34 3.156385e-01 -0.167826215  0.074214665
## 35 4.145204e-04  0.125514095  0.373515140 ***
## 36 3.611024e-01 -0.341175769  0.195411557

```

```
write.xlsx(Mod.res, 'Math.xlsx', sheetName = 'vsTD.logSDR', append = T)
```



## 3 Math ability: ASD versus the norm group

### 3.1 Meta-analysis of SDM

#### 3.1.1 Data preparation

```
#-----  
# remove studies not available to compute cohen's d  
var.sel = c('mathscores', 'SDmathscores', 'n', 'standardization_NOT')  
del = which(is.na(dall[,var.sel]), arr.ind = T)  
del = unique(del[,1])  
dsub = dall[-del,]  
  
# Compute effect sizes  
rr.math = dsub$Cronbach_math  
id = dsub$id # study labels  
Nstudy = nrow(dsub) # number of primary studies  
x1 = dsub$mathscores # group means  
x2 = rep(100, Nstudy)  
n1 = dsub$n # sample sizes  
n2 = n1  
s1 = dsub$SDmathscores # group SDs  
s2 = rep(15, Nstudy)  
sp = sqrt(((n1-1)*s1^2 + (n2-1)*s2^2)/(n1+n2-2))  
tmp = escalc(measure = 'SMD', m1i = x1, sd1i = s1, n1i = n1,  
             m2i = x2, sd2i = s2, n2i = n2)  
hedgesgmath = tmp$yi # unbiased effect sizes for math: hedge's g  
vimath = tmp$vi # sampling variances of effect sizes for math  
  
group = dsub$group # For multivariate meta-analysis with dependent effect sizes  
  
#### Organize moderators  
Age = dsub$Age  
Age = Age - mean(Age, na.rm = T)  
  
PubYear = dsub$PubYear - min(dsub$PubYear)  
  
Severity = dsub$calibrated.severity.scores  
Severity = Severity - mean(Severity, na.rm = T)  
  
fIQASD = dsub$fsiq - 100  
vIQASD = as.numeric(dsub$viq) - 100  
nvIQASD = dsub$nvIQASD  
  
AgexfIQ = data.frame(Age = scale(Age), fIQASD = scale(fIQASD),  
                    Inter = scale(Age)*scale(fIQASD))  
AgexvIQ = data.frame(Age = scale(Age), vIQASD = scale(vIQASD),  
                    Inter = scale(Age)*scale(vIQASD))  
AgexnvIQ = data.frame(Age = scale(Age), nvIQASD = scale(nvIQASD),  
                    Inter = scale(Age)*scale(nvIQASD))  
  
gender = dsub$gender.ratio  
gender = gender - mean(gender, na.rm = T)
```

```

modsl = list(Age = Age, Publication.Year = PubYear, ASD.Severity = Severity,
             genderratio = gender,
             fIQASD = fIQASD, vIQASD = vIQASD, nvIQASD = nvIQASD,
             AgexfIQ=AgexfIQ, AgexvIQ=AgexvIQ, AgexnvIQ=AgexnvIQ)

mods.plot = c(rep(0,4),rep(1,6))

```

### 3.1.2 Meta-analysis with RVE

```

dat.hedgesgmth = data.frame(hedgesgmth,vimath,id)
fit0 = robu(formula = hedgesgmth ~ 1, data = dat.hedgesgmth,
            studynum = id,var.eff.size = vimath,
            modelweights = "CORR", small = TRUE)
fit0$reg_table

```

```

##          labels          b.r          SE          t          dfs          prob          CI.L
## 1 X.Intercept. -0.3267161 0.1190399 -2.744594 59.70827 0.007990553 -0.5648552
##          CI.U sig
## 1 -0.08857703 ***

```

### 3.1.3 Moderator Analysis (meta-regression) with RVE

```

mods.names = names(modsl)
Mod.res = matrix(NA,1,9)
colnames(Mod.res) = c("labels","b.r","SE","t",
                     "dfs" ,"prob","CI.L","CI.U","sig" )
Mod.res = as.data.frame(Mod.res)
for(mi in 1:length(mods.names)){
  mod = as.matrix(modsl[[mi]])
  dat.tmp = cbind(dat.hedgesgmth,mod)
  fit.tmp = robu(formula = hedgesgmth ~ 1 + mod, data = dat.tmp,
                studynum = id,var.eff.size = vimath,
                modelweights = "CORR", small = TRUE)
  res.tmp = fit.tmp$reg_table
  res.tmp[1,1] = 'Intercept'
  nmod = ncol(mod)
  if(nmod == 1){
    res.tmp[2,1] = mods.names[mi]
  }else{
    res.tmp[2:(nmod+1),1] = colnames(mod)
  }
  Mod.res = rbind(Mod.res,res.tmp)
}
Mod.res[1,] = fit0$reg_table
Mod.res[1,1] = 'No moderator'
Mod.res

```

```

##          labels          b.r          SE          t          dfs
## 1 No moderator -0.3267161230 0.119039854 -2.74459446 59.708272
## 2 Intercept -0.3276378604 0.123261061 -2.65808080 54.854093
## 3 Age 0.0154981030 0.020394703 0.75990826 10.104874
## 4 Intercept -0.3417799072 0.222276546 -1.53763370 14.956903

```

```

## 5 Publication.Year 0.0006184932 0.010006652 0.06180821 20.982856
## 6 Intercept -0.2519772261 0.299804866 -0.84047077 10.932556
## 7 ASD.Severity -0.5007288237 0.445613171 -1.12368497 5.671401
## 8 Intercept -0.2327705553 0.132665513 -1.75456719 42.782695
## 9 genderratio 0.6351214921 0.697633664 0.91039399 2.282020
## 10 Intercept -0.1023673420 0.050007257 -2.04704972 40.089130
## 11 fIQASD 0.0487003096 0.007017317 6.94001828 6.442134
## 12 Intercept -0.1150290274 0.068847966 -1.67076871 26.166774
## 13 vIQASD 0.0480943294 0.005184087 9.27729937 7.757141
## 14 Intercept -0.2371160132 0.049720405 -4.76898797 28.567350
## 15 nvIQASD 0.0528456697 0.002484336 21.27154539 5.826960
## 16 Intercept -0.1497718905 0.050192602 -2.98394353 37.157038
## 17 Age 0.0252442824 0.074412172 0.33924937 10.251705
## 18 fIQASD 0.7943128793 0.079569741 9.98259980 7.228606
## 19 Inter -0.1077078445 0.168168790 -0.64047464 3.893151
## 20 Intercept -0.2566062184 0.056365053 -4.55257657 23.796604
## 21 Age -0.0760164870 0.049078414 -1.54887822 7.161780
## 22 vIQASD 0.5379728993 0.070750276 7.60382760 6.842993
## 23 Inter 0.0344822611 0.144611703 0.23844724 4.194282
## 24 Intercept -0.2706640823 0.047731934 -5.67050319 22.456674
## 25 Age 0.0286096302 0.041058451 0.69680248 5.979826
## 26 nvIQASD 0.7175912725 0.032957424 21.77328176 6.281671
## 27 Inter 0.0032289900 0.059866917 0.05393613 5.853552
## prob CI.L CI.U sig
## 1 7.990553e-03 -0.56485521 -0.088577032 ***
## 2 1.027648e-02 -0.57467332 -0.080602404 **
## 3 4.646694e-01 -0.02988028 0.060876485
## 4 1.450218e-01 -0.81567007 0.132110260
## 5 9.513005e-01 -0.02019251 0.021429500
## 6 4.186468e-01 -0.91234029 0.408385839
## 7 3.064477e-01 -1.60660369 0.605146040
## 8 8.649359e-02 -0.50035536 0.034814253 *
## 9 4.483151e-01 -2.03764774 3.307890727
## 10 4.724674e-02 -0.20342878 -0.001305904 **
## 11 3.246294e-04 0.03181121 0.065589411 ***
## 12 1.066873e-01 -0.25650416 0.026446108
## 13 1.815163e-05 0.03607434 0.060114317 ***
## 14 4.984510e-05 -0.33887260 -0.135359429 ***
## 15 9.541535e-07 0.04672269 0.058968650 ***
## 16 5.006631e-03 -0.25145726 -0.048086525 ***
## 17 7.412690e-01 -0.14000623 0.190494792
## 18 1.742238e-05 0.60735989 0.981265866 ***
## 19 5.576125e-01 -0.57971673 0.364301038
## 20 1.319414e-04 -0.37299061 -0.140221826 ***
## 21 1.643797e-01 -0.19153917 0.039506199
## 22 1.411915e-04 0.36989379 0.706052006 ***
## 23 8.227344e-01 -0.35979478 0.428759302
## 24 9.802666e-06 -0.36953747 -0.171790695 ***
## 25 5.120899e-01 -0.07193899 0.129158255
## 26 3.733571e-07 0.63781585 0.797366692 ***
## 27 9.587796e-01 -0.14415307 0.150611055

```

```
write.xlsx(Mod.res, 'Math.xlsx', sheetName = 'vsNorm.SMD', append = T)
```

## 3.2 Meta-analysis of variability (log SD ratio)

### 3.2.1 Data preparation

```
var.sel = c('SDmathscores','n','standardization_NOT')
del = which(is.na(dall[,var.sel]),arr.ind = T)
del = unique(del[,1])
dsub = dall[-del,]
group = dsub$group #For multivariate meta-analysis with dependent effect sizes
Nstudy = nrow(dsub) # number of primary studies
s1 = dsub$SDmathscores # group SDs
s2 = rep(15,Nstudy)
n1 = dsub$n # sample sizes
n2 = n1
yi = log(s1/s2)+1/2/(n1-1)-1/2/(n2-1)
vi = 1/2/(n1-1)+1/2/(n2-1)
```

### 3.2.2 Meta-analysis with RVE

```
dat.sdmath = data.frame(yi,vi,id)
fit.res = robu(formula = yi ~ 1, data = dat.sdmath,
               studynum = id,var.eff.size = vi,
               modelweights = "CORR", small = TRUE)
fit.res$reg_table
```

```
##          labels          b.r          SE          t          dfs          prob          CI.L
## 1 X.Intercept. 0.1697604 0.02882973 5.888381 50.70939 3.121353e-07 0.1118743
##          CI.U sig
## 1 0.2276466 ***
```

### 3.2.3 Moderator Analysis (meta-regression) with RVE

```
mods.names = names(modsl)
Mod.res = matrix(NA,1,9)
colnames(Mod.res) = c("labels","b.r","SE","t",
                     "dfs" ,"prob","CI.L","CI.U","sig" )
Mod.res = as.data.frame(Mod.res)
for(mi in 1:length(mods.names)){
  mod = as.matrix(modsl[[mi]])
  dat.tmp = cbind(dat.sdmath,mod)
  fit.tmp = robu(formula =yi ~ 1 + mod, data = dat.tmp,
                 studynum = id,var.eff.size = vi,
                 modelweights = "CORR", small = TRUE)
  res.tmp = fit.tmp$reg_table
  res.tmp[1,1] = 'Intercept'
  nmod = ncol(mod)
  if(nmod == 1){
    res.tmp[2,1] = mods.names[mi]
  }else{
    res.tmp[2:(nmod+1),1] = colnames(mod)
  }
  Mod.res = rbind(Mod.res,res.tmp)
}
Mod.res[1,] = fit0$reg_table
```

```
Mod.res[1,1] = 'No moderator'
Mod.res
```

| ##    | labels           | b.r           | SE          | t          | dfs       | prob         |
|-------|------------------|---------------|-------------|------------|-----------|--------------|
| ## 1  | No moderator     | -0.3267161230 | 0.119039854 | -2.7445945 | 59.708272 | 7.990553e-03 |
| ## 2  | Intercept        | 0.1712683866  | 0.026997725 | 6.3438082  | 44.751365 | 9.841265e-08 |
| ## 3  | Age              | 0.0177977646  | 0.005278168 | 3.3719585  | 9.121522  | 8.075799e-03 |
| ## 4  | Intercept        | 0.1900007619  | 0.067681623 | 2.8072725  | 15.478516 | 1.295872e-02 |
| ## 5  | Publication.Year | -0.0008463283 | 0.002889228 | -0.2929254 | 21.333445 | 7.724094e-01 |
| ## 6  | Intercept        | 0.1367014397  | 0.062439045 | 2.1893583  | 10.493116 | 5.216750e-02 |
| ## 7  | ASD.Severity     | -0.0861160982 | 0.048801894 | -1.7646056 | 5.357371  | 1.339847e-01 |
| ## 8  | Intercept        | 0.1652950763  | 0.034625643 | 4.7737764  | 34.764177 | 3.216017e-05 |
| ## 9  | genderratio      | -0.1357438878 | 0.136364686 | -0.9954475 | 2.381945  | 4.096569e-01 |
| ## 10 | Intercept        | 0.1630728920  | 0.030826862 | 5.2899608  | 37.162210 | 5.674875e-06 |
| ## 11 | fIQASD           | -0.0041432421 | 0.001603145 | -2.5844462 | 5.806559  | 4.277560e-02 |
| ## 12 | Intercept        | 0.1808782610  | 0.036557236 | 4.9478100  | 23.523262 | 5.002051e-05 |
| ## 13 | vIQASD           | -0.0014541519 | 0.002872124 | -0.5062984 | 7.536978  | 6.271199e-01 |
| ## 14 | Intercept        | 0.1705401632  | 0.035689121 | 4.7784916  | 27.914707 | 5.117200e-05 |
| ## 15 | nvIQASD          | 0.0009150934  | 0.002668855 | 0.3428787  | 4.413101  | 7.474082e-01 |
| ## 16 | Intercept        | 0.1753100202  | 0.028440550 | 6.1640868  | 33.511911 | 5.596145e-07 |
| ## 17 | Age              | 0.0935158596  | 0.032139247 | 2.9097091  | 9.751419  | 1.596708e-02 |
| ## 18 | fIQASD           | -0.0572518830 | 0.026527472 | -2.1582110 | 5.983054  | 7.438869e-02 |
| ## 19 | Inter            | 0.0131262194  | 0.037393597 | 0.3510285  | 3.640764  | 7.449253e-01 |
| ## 20 | Intercept        | 0.2030026274  | 0.033645328 | 6.0336053  | 20.263204 | 6.367588e-06 |
| ## 21 | Age              | 0.0111199403  | 0.025658736 | 0.4333783  | 7.736389  | 6.765692e-01 |
| ## 22 | vIQASD           | -0.0682309285 | 0.037996404 | -1.7957207 | 6.976159  | 1.157516e-01 |
| ## 23 | Inter            | -0.2381612007 | 0.083131671 | -2.8648673 | 5.588174  | 3.100098e-02 |
| ## 24 | Intercept        | 0.1629705490  | 0.035594126 | 4.5785799  | 21.697509 | 1.514391e-04 |
| ## 25 | Age              | 0.0111541256  | 0.042324864 | 0.2635360  | 6.293179  | 8.005554e-01 |
| ## 26 | nvIQASD          | 0.0123260631  | 0.032332695 | 0.3812260  | 5.161231  | 7.182263e-01 |
| ## 27 | Inter            | -0.1136144037 | 0.067538591 | -1.6822146 | 6.106908  | 1.426517e-01 |
| ##    | CI.L             | CI.U          | sig         |            |           |              |
| ## 1  | -0.564855214     | -0.0885770318 | ***         |            |           |              |
| ## 2  | 0.116883838      | 0.2256529350  | ***         |            |           |              |
| ## 3  | 0.005881923      | 0.0297136065  | ***         |            |           |              |
| ## 4  | 0.046128260      | 0.3338732634  | **          |            |           |              |
| ## 5  | -0.006849093     | 0.0051564365  |             |            |           |              |
| ## 6  | -0.001540282     | 0.2749431612  | *           |            |           |              |
| ## 7  | -0.209089675     | 0.0368574784  |             |            |           |              |
| ## 8  | 0.094984235      | 0.2356059178  | ***         |            |           |              |
| ## 9  | -0.640928007     | 0.3694402315  |             |            |           |              |
| ## 10 | 0.100620938      | 0.2255248458  | ***         |            |           |              |
| ## 11 | -0.008097894     | -0.0001885906 | **          |            |           |              |
| ## 12 | 0.105346831      | 0.2564096907  | ***         |            |           |              |
| ## 13 | -0.008148778     | 0.0052404740  |             |            |           |              |
| ## 14 | 0.097424249      | 0.2436560772  | ***         |            |           |              |
| ## 15 | -0.006229137     | 0.0080593236  |             |            |           |              |
| ## 16 | 0.117480845      | 0.2331391951  | ***         |            |           |              |
| ## 17 | 0.021656939      | 0.1653747803  | **          |            |           |              |
| ## 18 | -0.122206860     | 0.0077030940  | *           |            |           |              |
| ## 19 | -0.094862642     | 0.1211150807  |             |            |           |              |
| ## 20 | 0.132878100      | 0.2731271550  | ***         |            |           |              |
| ## 21 | -0.048401992     | 0.0706418722  |             |            |           |              |
| ## 22 | -0.158140430     | 0.0216785728  |             |            |           |              |

```
## 23 -0.445266774 -0.0310556277 **
## 24  0.089093138  0.2368479601 ***
## 25 -0.091252716  0.1135609676
## 26 -0.070012882  0.0946650080
## 27 -0.278176622  0.0509478143

write.xlsx(Mod.res, 'Math.xlsx', sheetName = 'vsNorm.logSD', append = T)
```
